# Supplementary material for: Metal-free direct cyanoisopropylation/arylation of N-arylacrylamides or N-alkyl-N-(arylsulfonyl)acrylamides with AIBN: a simple and mild approach to cyano-containing oxindoles
Source: Royal Society of Chemistry journal article supplement (doi:10.1039/c5ra10084d), 2015-01-01

## Supplementary Information

### **Metal-free direct cyanoisopropylation/arylation of *N*-arylacrylamides or *N*-alkyl-*N*- (arylsulfonyl)acrylamides with AIBN: a simple and mild approach to cyano-containing oxindoles**

Mingzhong Zhang,<sup>a</sup> Wenbing Sheng,<sup>a,b</sup> Pengyi Ji,<sup>a</sup> Yufeng Liu,<sup>a</sup> and Cancheng Guo<sup>\*a</sup>

<sup>a</sup>College of Chemistry and Chemical Engineering, Hunan University, Changsha 410082, P. R. China.

<sup>b</sup>Hunan University of Chinese Medicine, Changsha 410208, P. R. China.

*E-mail: ccguo@hnu.edu.cn*

### **Table of Contents**

|                                                   |               |
|---------------------------------------------------|---------------|
| <b>General remarks</b>                            | <b>S2</b>     |
| <b>Typical experimental procedure</b>             | <b>S2-3</b>   |
| <b>Screening of reaction conditions</b>           | <b>S3</b>     |
| <b>Preliminary mechanistic studies with TEMPO</b> | <b>S3-4</b>   |
| <b>Characterization data of products</b>          | <b>S4-12</b>  |
| <b>References</b>                                 | <b>S12</b>    |
| <b>NMR Spectra</b>                                | <b>S13-30</b> |

## General remarks

Reagents were purchased from commercial sources and were used as received unless mentioned otherwise. All solvents were dried and distilled prior to use according to the standard protocols.  $^1\text{H}$  and  $^{13}\text{C}$  NMR spectra were obtained in  $\text{CDCl}_3$  with TMS as internal standard (400 MHz  $^1\text{H}$ , 100 MHz  $^{13}\text{C}$ ) at room temperature. Multiplicities are indicated as s (singlet), d (doublet), t (triplet), q (quintet), m (multiplet) and coupling constants ( $J$ ) are reported in hertz. HRMS was measured on an electrospray ionization (ESI) apparatus using time-of-flight (TOF) mass spectrometry. IR measurements were performed with a FTIR SHIMADZU DR-8000 spectrometer that was fitted with a Pike Technologies MIRacle Single Reflection ATR adapter. Melting points were determined using XT-4 apparatus and are uncorrected.

## Typical experimental procedure

### (1) Synthesis of substrates

*N*-Arylacrylamides **1a-q** and **4**<sup>[S1]</sup> and *N*-alkyl-*N*-(arylsulfonyl) acrylamides **1t-v**<sup>[S2]</sup> were prepared according to literature procedures.

### (2) General procedure for the synthesis of cyano-containing oxindoles through metal-free direct cyanoisopropylation/arylation of alkenes with AIBN

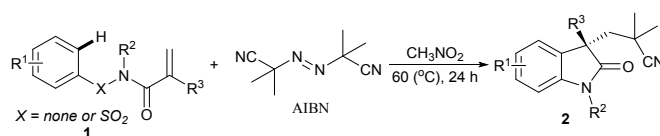

To an oven-dried Schlenk tube was added substrate **1** (0.2 mmol), AIBN (0.6 mmol), and  $\text{CH}_3\text{NO}_2$  (1 mL). The tube was then charged with nitrogen, and the mixture was stirred at  $60\text{ }^\circ\text{C}$  for 24 h. The reaction mixture was then allowed to cool

to room temperature, after which the crude reaction mixture was loaded directly onto a column of silica gel and purified by column chromatography (petroleum ether-ethyl acetate = 6:1) to give the desired product **2**.

**Table S1. Screening of Reaction Conditions.<sup>a</sup>**

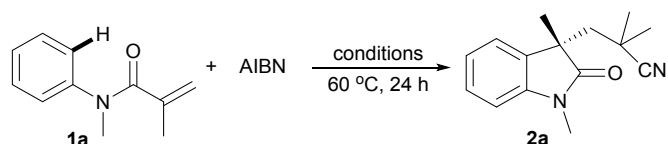

| Entry          | AIBN (equiv.) | Oxidant (equiv.)                                                    | Solvent                         | Conv <sup>b</sup> (%) | Yield <sup>c</sup> (%) |
|----------------|---------------|---------------------------------------------------------------------|---------------------------------|-----------------------|------------------------|
| 1              | 1.5           | none                                                                | CH <sub>3</sub> NO <sub>2</sub> | 63                    | 61                     |
| 2              | 1.5           | O <sub>2</sub> (balloon)                                            | CH <sub>3</sub> NO <sub>2</sub> | 10                    | trace                  |
| 3              | 1.5           | K <sub>2</sub> S <sub>2</sub> O <sub>8</sub> (2.0)                  | CH <sub>3</sub> NO <sub>2</sub> | 86                    | 58                     |
| 4              | 1.5           | (NH <sub>4</sub> ) <sub>2</sub> S <sub>2</sub> O <sub>8</sub> (2.0) | CH <sub>3</sub> NO <sub>2</sub> | 85                    | 54                     |
| 5 <sup>d</sup> | 1.5           | none                                                                | CH <sub>3</sub> NO <sub>2</sub> | 52                    | 49                     |
| 6 <sup>e</sup> | 1.5           | none                                                                | CH <sub>3</sub> NO <sub>2</sub> | 68                    | 64                     |
| 7              | 3.0           | none                                                                | CH <sub>3</sub> NO <sub>2</sub> | 95                    | 89                     |
| 8              | 4.0           | none                                                                | CH <sub>3</sub> NO <sub>2</sub> | >95                   | 86                     |
| 9              | 3.0           | none                                                                | DMSO                            | >95                   | 31                     |
| 10             | 3.0           | none                                                                | DMF                             | 32                    | trace                  |
| 11             | 3.0           | none                                                                | toluene                         | 60                    | 15                     |
| 12             | 3.0           | none                                                                | CH <sub>3</sub> CN              | 67                    | 12                     |
| 13             | 3.0           | none                                                                | CH <sub>3</sub> NO <sub>2</sub> | >95                   | 87                     |
| 14             | 3.0           | none                                                                | CH <sub>3</sub> NO <sub>2</sub> | 93                    | 85                     |
| 15             | 3.0           | none                                                                | CH <sub>3</sub> NO <sub>2</sub> | >95                   | 88                     |

<sup>a</sup>Reaction conditions: *N*-arylacrylamide **1a** (0.2 mmol), solvent (1.0 mL), 60 °C, under N<sub>2</sub> atmosphere. <sup>b</sup>Conversion based on TLC analysis and amount of recovered starting material. <sup>c</sup>Yield of isolated product. <sup>d</sup>Temperature: 80 °C. <sup>e</sup>Reaction time: 48h.

## Preliminary mechanistic studies with TEMPO

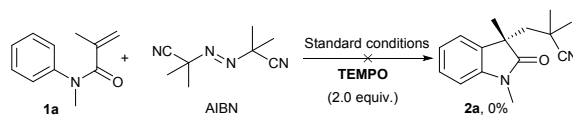

To an oven-dried Schlenk tube was added *N*-arylacrylamide **1a** (0.2 mmol), AIBN (0.6 mmol), TEMPO (0.4 mmol), and CH<sub>3</sub>NO<sub>2</sub> (1 mL). The tube was then charged with nitrogen, and the mixture was stirred at 60 °C for 24 h. When the reaction mixture was investigated by GC-MS, no desired product was observed.

## Characterization data of products

### 3-(1,3-Dimethyl-2-oxindolin-3-yl)-2,2-dimethylpropanenitrile (**2a**):

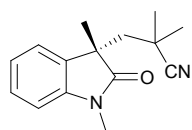

White solid (43.1 mg, 89%); mp 117-118 °C; <sup>1</sup>H NMR (400 MHz, CDCl<sub>3</sub>) δ 7.35-7.31 (m, 2H), 7.11 (t, *J* = 7.5 Hz, 1H), 6.90 (d, *J* = 7.6 Hz, 1H), 3.24 (s, 3H), 2.33 (d, *J* = 14.4 Hz, 1H), 2.16 (d, *J* = 14.4 Hz, 1H), 1.35 (s, 3H), 1.16 (s, 3H), 1.08 (s, 3H); <sup>13</sup>C NMR (100 MHz, CDCl<sub>3</sub>) δ 179.5, 143.0, 130.8, 128.5, 124.6, 123.8, 122.4, 108.4, 46.9, 46.4, 30.6, 29.5, 27.3, 26.6, 26.3; IR (KBr):  $\tilde{\nu}$  = 2242, 1718, 1613, 1436, 1379, 1339 cm<sup>-1</sup>; HRMS *m/z* (ESI) calcd for C<sub>15</sub>H<sub>18</sub>N<sub>2</sub>O<sup>+</sup> [M<sup>+</sup>], 242.1419; found, 242.1417.

### 3-(5-Fluoro-1,3-dimethyl-2-oxindolin-3-yl)-2,2-dimethylpropanenitrile (**2b**):

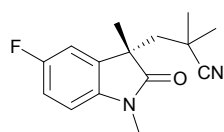

Yellow oil (27 mg, 52%); <sup>1</sup>H NMR (400 MHz, CDCl<sub>3</sub>) δ 7.07-7.00 (m, 2H), 6.84-6.80 (m, 1H), 3.23 (s, 3H), 2.33 (d, *J* = 14.6 Hz, 1H), 2.11 (d, *J* = 14.6

Hz, 1H), 1.35 (s, 3H), 1.17 (s, 3H), 1.11 (s, 3H);  $^{13}\text{C}$  NMR (100 MHz,  $\text{CDCl}_3$ )  $\delta$  179.1, 160.4, 158.0, 139.0, 132.7, 132.6, 123.7, 115.0, 114.7, 112.8, 112.6, 109.0, 108.9, 47.4, 47.4, 46.5, 30.6, 29.6, 27.3, 26.8, 26.5; IR (KBr):  $\tilde{\nu}$  = 2236, 1717, 1621, 1435, 1376, 1338  $\text{cm}^{-1}$ ; HRMS  $m/z$  (ESI) calcd for  $\text{C}_{15}\text{H}_{17}\text{FN}_2\text{O}^+$  [ $\text{M}^+$ ], 260.1325; found, 260.1324.

**3-(5-Chloro-1,3-dimethyl-2-oxoindolin-3-yl)-2,2-dimethylpropanenitrile (2c):**

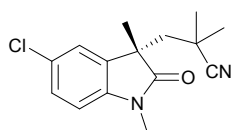

White solid (37.6 mg, 68%); mp 135-136  $^{\circ}\text{C}$ ;  $^1\text{H}$  NMR (400 MHz,  $\text{CDCl}_3$ )  $\delta$  7.31-7.28 (m, 2H), 6.82 (d,  $J$  = 8.4 Hz, 1H), 3.22 (s, 3H), 2.32 (d,  $J$  = 14.6 Hz, 1H), 2.11 (d,  $J$  = 14.6 Hz, 1H), 1.35 (s, 3H), 1.16 (s, 3H), 1.11 (s, 3H);  $^{13}\text{C}$  NMR (100 MHz,  $\text{CDCl}_3$ )  $\delta$  179.0, 141.7, 132.7, 128.5, 127.9, 125.0, 123.6, 109.4, 47.2, 46.5, 30.6, 29.6, 27.2, 27.0, 26.5; IR (KBr):  $\tilde{\nu}$  = 2242, 1715, 1614, 1436, 1378, 1334  $\text{cm}^{-1}$ ; HRMS  $m/z$  (ESI) calcd for  $\text{C}_{15}\text{H}_{17}\text{ClN}_2\text{O}^+$  [ $\text{M}^+$ ], 276.1028; found, 276.1027; HRMS  $m/z$  (ESI) calcd for  $\text{C}_{15}\text{H}_{17}^{37}\text{ClN}_2\text{O}^+$  [ $\text{M}^+$ ], 278.1001; found, 278.1003.

**3-(5-Bromo-1,3-dimethyl-2-oxoindolin-3-yl)-2,2-dimethylpropanenitrile (2d):**

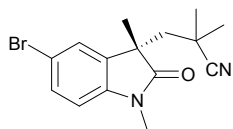

White solid (48.2 mg, 75%); mp 141-143  $^{\circ}\text{C}$ ;  $^1\text{H}$  NMR (400 MHz,  $\text{CDCl}_3$ )  $\delta$  7.46-7.41 (m, 2H), 6.78 (d,  $J$  = 8.2 Hz, 1H), 3.22 (s, 3H), 2.32 (d,  $J$  = 14.6 Hz, 1H), 2.10 (d,  $J$  = 14.6 Hz, 1H), 1.34 (s, 3H), 1.15 (s, 3H), 1.11 (s, 3H);  $^{13}\text{C}$  NMR (100 MHz,  $\text{CDCl}_3$ )  $\delta$  178.9, 142.2, 133.1, 131.4, 127.7, 123.6, 115.1, 109.9, 47.2, 46.5, 30.6, 29.5, 27.2, 27.1, 26.4; IR (KBr):  $\tilde{\nu}$  = 2235, 1716, 1621, 1431, 1380, 1329  $\text{cm}^{-1}$ ; HRMS  $m/z$  (ESI) calcd for  $\text{C}_{15}\text{H}_{17}\text{BrN}_2\text{O}^+$  [ $\text{M}^+$ ], 320.0524; found, 320.0525; HRMS

$m/z$  (ESI) calcd for  $C_{15}H_{17}^{81}BrN_2O^+$  [ $M^+$ ], 322.0504; found, 322.0502.

**3-(5-Iodo-1,3-dimethyl-2-oxoindolin-3-yl)-2,2-dimethylpropanenitrile (2e):**

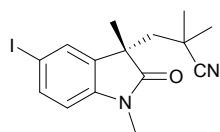

White solid (60 mg, 80%); mp 138-139 °C;  $^1H$  NMR (400 MHz,  $CDCl_3$ )  $\delta$  7.64-7.57 (m, 2H), 6.68 (d,  $J = 8.2$  Hz, 1H), 3.20 (s, 3H), 2.31 (d,  $J = 14.6$  Hz, 1H), 2.09 (d,  $J = 14.6$  Hz, 1H), 1.33 (s, 3H), 1.14 (s, 3H), 1.10 (s, 3H);  $^{13}C$  NMR (100 MHz,  $CDCl_3$ )  $\delta$  178.7, 142.9, 137.3, 133.4, 133.3, 123.6, 110.5, 84.9, 47.0, 46.5, 30.5, 29.5, 27.2, 27.1, 26.4; IR (KBr):  $\tilde{\nu} = 2237, 1718, 1625, 1437, 1381, 1341$   $cm^{-1}$ ; HRMS  $m/z$  (ESI) calcd for  $C_{15}H_{17}IN_2O^+$  [ $M^+$ ], 368.0386; found, 368.0389.

**3-(2-Cyano-2-methylpropyl)-1,3-dimethyl-2-oxoindoline-5-carbonitrile (2f):**

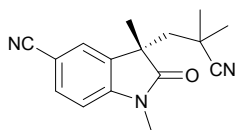

White solid (32 mg, 60%); mp 123-125 °C;  $^1H$  NMR (400 MHz,  $CDCl_3$ )  $\delta$  7.66-7.63 (m, 1H), 7.54 (d,  $J = 1.2$  Hz, 1H), 6.97 (d,  $J = 8.0$  Hz, 1H), 3.26 (s, 3H), 2.33 (d,  $J = 14.8$  Hz, 1H), 2.14 (d,  $J = 14.8$  Hz, 1H), 1.36 (s, 3H), 1.13 (d,  $J = 3.4$  Hz, 6H);  $^{13}C$  NMR (100 MHz,  $CDCl_3$ )  $\delta$  179.1, 147.0, 133.8, 132.1, 127.7, 123.7, 119.0, 109.0, 105.6, 46.8, 46.4, 30.4, 29.5, 27.3, 27.0, 26.5; IR (KBr):  $\tilde{\nu} = 2218, 1719, 1611, 1448, 1359, 1318$   $cm^{-1}$ ; HRMS  $m/z$  (ESI) calcd for  $C_{16}H_{17}N_3O^+$  [ $M^+$ ], 267.1372; found, 267.1370.

**2,2-Dimethyl-3-(1,3,5-trimethyl-2-oxoindolin-3-yl)propanenitrile (2h):**

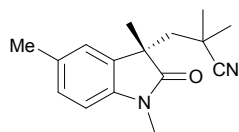

White solid (41.5 mg, 81%); mp 100-102 °C;  $^1H$  NMR (400 MHz,  $CDCl_3$ )  $\delta$  7.11 (d,  $J = 8.8$  Hz, 2H), 6.77 (d,  $J = 7.6$  Hz, 1H), 3.20 (s, 3H), 2.34 (s, 3H),

2.29 (d,  $J = 14.6$  Hz, 1H), 2.13 (d,  $J = 14.6$  Hz, 1H), 1.32 (s, 3H), 1.15 (s, 3H), 1.05 (s, 3H);  $^{13}\text{C}$  NMR (100 MHz,  $\text{CDCl}_3$ )  $\delta$  179.5, 140.6, 131.9, 130.8, 128.7, 125.5, 124.0, 108.1, 46.9, 46.3, 30.6, 29.6, 27.3, 26.4, 26.3, 21.1; IR (KBr):  $\tilde{\nu} = 2232, 1720, 1619, 1431, 1377, 1320$   $\text{cm}^{-1}$ ; HRMS  $m/z$  (ESI) calcd for  $\text{C}_{16}\text{H}_{20}\text{N}_2\text{O}^+$  [ $\text{M}^+$ ], 256.1576; found, 256.1577.

**3-(5-Methoxy-1,3-dimethyl-2-oxindolin-3-yl)-2,2-dimethylpropanenitrile (2i):**

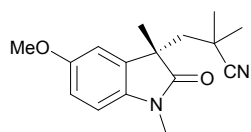

White solid (50.7 mg, 93%); mp 108-109 °C;  $^1\text{H}$  NMR (400 MHz,  $\text{CDCl}_3$ )  $\delta$  6.94 (d,  $J = 2.4$  Hz, 1H), 6.87-6.84 (m, 1H), 6.80 (d,  $J = 8.4$  Hz, 1H), 3.81 (s, 3H), 3.21 (s, 3H), 2.32 (d,  $J = 14.6$  Hz, 1H), 2.14 (d,  $J = 14.6$  Hz, 1H), 1.34 (s, 3H), 1.19 (s, 3H), 1.07 (s, 3H);  $^{13}\text{C}$  NMR (100 MHz,  $\text{CDCl}_3$ )  $\delta$  179.2, 155.8, 136.5, 132.1, 124.0, 113.1, 112.1, 108.7, 55.8, 47.3, 46.3, 30.6, 29.6, 27.4, 26.4, 26.3; IR (KBr):  $\tilde{\nu} = 2238, 1718, 1625, 1432, 1372, 1314$   $\text{cm}^{-1}$ ; HRMS  $m/z$  (ESI) calcd for  $\text{C}_{16}\text{H}_{20}\text{N}_2\text{O}_2^+$  [ $\text{M}^+$ ], 272.1525; found, 272.1526.

**3-(1,3-Dimethyl-2-oxo-7-phenylindolin-3-yl)-2,2-dimethylpropanenitrile (2j):**

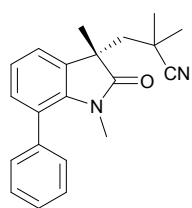

White solid (52.2 mg, 82%); mp 130-132 °C;  $^1\text{H}$  NMR (400 MHz,  $\text{CDCl}_3$ )  $\delta$  7.42-7.35 (m, 5H), 7.31-7.29 (m, 1H), 7.17-7.09 (m, 2H), 2.75 (s, 3H), 2.36 (d,  $J = 14.4$  Hz, 1H), 2.18 (d,  $J = 14.4$  Hz, 1H), 1.40 (s, 3H), 1.20 (s, 3H), 1.15 (s, 3H);  $^{13}\text{C}$  NMR (100 MHz,  $\text{CDCl}_3$ )  $\delta$  180.5, 140.1, 138.8, 131.5, 130.1, 129.5, 127.7, 127.6, 125.9, 123.8, 123.4, 121.6, 46.8, 46.2, 30.6, 30.3, 29.7, 27.6, 26.9; IR (KBr):  $\tilde{\nu} = 2238,$

1719, 1622, 1427, 1377, 1330  $\text{cm}^{-1}$ ; HRMS  $m/z$  (ESI) calcd for  $\text{C}_{21}\text{H}_{22}\text{N}_2\text{O}^+$  [ $\text{M}^+$ ], 318.1732; found, 318.1731.

**3-(7-Iodo-1,3-dimethyl-2-oxoindolin-3-yl)-2,2-dimethylpropanenitrile (2k):**

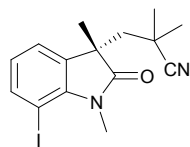

White solid (46.4 mg, 63%); mp 136-138  $^{\circ}\text{C}$ ;  $^1\text{H}$  NMR (400 MHz,  $\text{CDCl}_3$ )  $\delta$  7.75-7.73 (m, 1H), 7.27 (d,  $J = 7.8$  Hz, 1H), 6.82 (t,  $J = 7.7$  Hz, 1H), 3.64 (s, 3H), 2.32 (d,  $J = 14.6$  Hz, 1H), 2.16 (d,  $J = 14.6$  Hz, 1H), 1.34 (s, 3H), 1.20 (s, 3H), 1.09 (s, 3H);  $^{13}\text{C}$  NMR (100 MHz,  $\text{CDCl}_3$ )  $\delta$  180.3, 143.4, 141.2, 133.8, 124.4, 124.1, 123.8, 71.9, 46.5, 46.5, 30.6, 30.3, 29.7, 27.8, 26.4; IR (KBr):  $\tilde{\nu} = 2236, 1719, 1625, 1435, 1380, 1338$   $\text{cm}^{-1}$ ; HRMS  $m/z$  (ESI) calcd for  $\text{C}_{15}\text{H}_{17}\text{IN}_2\text{O}^+$  [ $\text{M}^+$ ], 368.0386; found, 368.0385.

**2,2-Dimethyl-3-(1-methyl-2-oxo-1,2,5,6-tetrahydro-4H-pyrrolo[3,2,1-ij] quinolin-1-yl)propanenitrile (2l):**

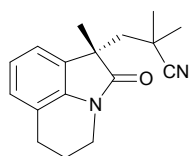

Colorless oil (45.6 mg, 85%);  $^1\text{H}$  NMR (400 MHz,  $\text{CDCl}_3$ )  $\delta$  7.12 (d,  $J = 7.6$  Hz, 1H), 7.05 (d,  $J = 7.6$  Hz, 1H), 6.96 (t,  $J = 7.5$  Hz, 1H), 3.76-3.67 (m, 2H), 2.81-2.76 (m, 2H), 2.30 (d,  $J = 14.4$  Hz, 1H), 2.11 (d,  $J = 14.4$  Hz, 1H), 2.05-1.96 (m, 2H), 1.33 (s, 3H), 1.14 (s, 3H), 1.10 (s, 3H);  $^{13}\text{C}$  NMR (100 MHz,  $\text{CDCl}_3$ )  $\delta$  178.3, 138.8, 129.3, 127.2, 123.9, 122.4, 121.7, 120.5, 48.2, 46.3, 38.8, 30.6, 29.4, 27.0, 26.8, 24.5, 20.9; IR (KBr):  $\tilde{\nu} = 2237, 1717, 1615, 1470, 1379, 1345$   $\text{cm}^{-1}$ ; HRMS  $m/z$  (ESI) calcd for  $\text{C}_{17}\text{H}_{20}\text{N}_2\text{O}^+$  [ $\text{M}^+$ ], 268.1576; found, 268.1578.

**3-(1-Ethyl-3,6-dimethyl-2-oxoindolin-3-yl)-2,2-dimethylpropanenitrile and 3-(1-**



**Ethyl-3,4-dimethyl-2-oxoindolin-3-yl)-2,2-dimethylpropanenitrile (2m + 2m')**:

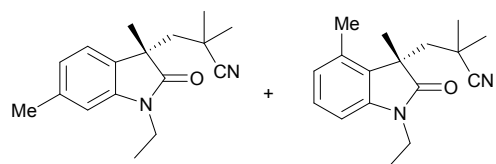

Colorless oil (48.7 mg, 90%); <sup>1</sup>H NMR (400

MHz, CDCl<sub>3</sub>) δ 7.21 (t, *J* = 7.7 Hz, 1.31H), 6.90 (d, *J* = 7.3 Hz, 0.35H), 6.85 (d, *J* = 7.8 Hz, 1H), 6.77 -6.73 (m, 1.32H), 3.84-3.69 (m, 2.8H), 2.44 (s, 3H), 2.41-2.37 (m, 2.11H), 2.31-2.15 (m, 1.8H), 1.61 (s, 1H), 1.39 (s, 3H), 1.29-1.20 (m, 9.37H), 1.07 (s, 3H), 1.04 (s, 1H); <sup>13</sup>C NMR (100 MHz, CDCl<sub>3</sub>) δ 179.5, 179.1, 142.2, 142.0, 138.5, 136.1, 128.3, 128.2, 125.0, 124.7, 124.2, 123.5, 122.7, 109.4, 106.2, 47.5, 46.6, 46.0, 44.7, 34.7, 34.6, 30.9, 30.7, 29.6, 29.4, 27.9, 25.9, 25.7, 24.8, 21.8, 19.0, 12.2, 12.1; IR (KBr):  $\tilde{\nu}$  = 2244, 1728, 1627, 1476, 1369, 1349 cm<sup>-1</sup>; HRMS *m/z* (ESI) calcd for C<sub>17</sub>H<sub>22</sub>N<sub>2</sub>O<sup>+</sup> [M<sup>+</sup>], 270.1732; found, 270.1729.

**3-(3-(Hydroxymethyl)-1-methyl-2-oxoindolin-3-yl)-2,2-dimethylpropanenitrile (2o):**

(2o):

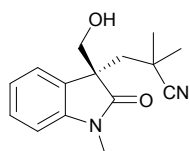

White solid (25.8 mg, 50%); mp 141-142 °C; <sup>1</sup>H NMR (400 MHz, CDCl<sub>3</sub>) δ 7.9-7.34 (m, 2H), 7.12 (t, *J* = 7.5 Hz, 1H), 6.93 (d, *J* = 7.8 Hz, 1H), 3.70 (d, *J* = 10.8 Hz, 1H), 3.60 (d, *J* = 10.8 Hz, 1H), 3.24 (s, 3H), 2.47 (d, *J* = 14.7 Hz, 1H), 2.25 (d, *J* = 14.7 Hz, 1H), 1.18 (s, 3H), 1.11 (s, 3H); <sup>13</sup>C NMR (100 MHz, CDCl<sub>3</sub>) δ 178.2, 143.9, 129.2, 127.0, 125.1, 123.9, 122.6, 108.7, 68.9, 52.7, 41.6, 30.3, 29.7, 26.9, 26.3; IR (KBr):  $\tilde{\nu}$  = 3569, 2228, 1723, 1630, 1473, 1495, 1385, 1350 cm<sup>-1</sup>; HRMS *m/z* (ESI) calcd for C<sub>15</sub>H<sub>18</sub>N<sub>2</sub>O<sub>2</sub><sup>+</sup> [M<sup>+</sup>], 258.1368; found, 258.1365.

**(3-(2-Cyano-2-methylpropyl)-1-methyl-2-oxoindolin-3-yl)methyl acetate (2p):**

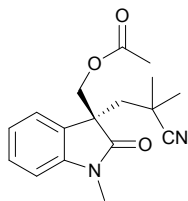

White solid (46.3 mg, 77%); mp 159-162 °C; <sup>1</sup>H NMR (400 MHz, CDCl<sub>3</sub>) δ 7.37-7.33 (m, 2H), 7.08 (t, *J* = 7.6 Hz, 1H), 6.91-6.89 (m, 1H), 4.34 (d, *J* = 10.7 Hz, 1H), 3.99 (d, *J* = 10.7 Hz, 1H), 3.23 (s, 3H), 2.28 (s, 2H), 1.89 (s, 3H), 1.17 (s, 3H), 1.10 (s, 3H); <sup>13</sup>C NMR (100 MHz, CDCl<sub>3</sub>) δ 176.3, 170.1, 143.9, 129.3, 126.3, 125.8, 123.6, 122.4, 108.5, 68.4, 50.9, 41.5, 30.2, 29.7, 26.7, 26.4, 20.4; IR (KBr):  $\tilde{\nu}$  = 2241, 1745, 1713, 1617, 1488, 1377, 1341 cm<sup>-1</sup>; HRMS *m/z* (ESI) calcd for C<sub>17</sub>H<sub>20</sub>N<sub>2</sub>O<sub>3</sub><sup>+</sup> [M<sup>+</sup>], 300.1474; found, 300.1473.

**3-(3-((1,3-Dioxoisindolin-2-yl)methyl)-1-methyl-2-oxoindolin-3-yl)-2,2-dimethylpropanenitrile (2q):**

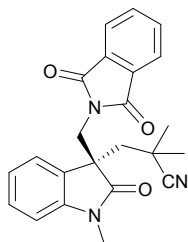

White solid (43.4 mg, 56%); mp 188-189 °C; <sup>1</sup>H NMR (400 MHz, CDCl<sub>3</sub>) δ 7.83-7.79 (m, 2H), 7.72-7.69 (m, 2H), 7.34-7.31 (m, 2H), 7.07-7.03 (m, 1H), 6.90-6.88 (m, 1H), 3.98 (d, *J* = 14.0 Hz, 1H), 3.84 (d, *J* = 14.0 Hz, 1H), 3.24 (s, 3H), 2.51-2.42 (m, 2H), 1.21 (s, 3H), 1.07 (s, 3H); <sup>13</sup>C NMR (100 MHz, CDCl<sub>3</sub>) δ 176.7, 168.0, 143.8, 134.1, 131.6, 129.5, 126.4, 125.9, 123.9, 123.5, 122.2, 108.7, 51.3, 45.4, 43.2, 30.5, 30.1, 26.6, 26.5; IR (KBr):  $\tilde{\nu}$  = 2240, 1728, 1721, 1690, 1617, 1538, 1472, 1379, 1344 cm<sup>-1</sup>; HRMS *m/z* (ESI) calcd for C<sub>23</sub>H<sub>21</sub>N<sub>3</sub>O<sub>3</sub><sup>+</sup> [M<sup>+</sup>], 387.1583; found, 387.1583.

**3-(1-Benzyl-3-methyl-2-oxoindolin-3-yl)-2,2-dimethylpropanenitrile (2u):**

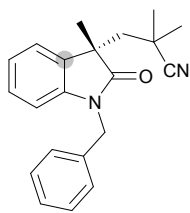

Colorless oil (41.3 mg, 65%);  $^1\text{H NMR}$  (400 MHz,  $\text{CDCl}_3$ )  $\delta$  7.35-7.20 (m, 7H), 7.08 (t,  $J = 7.5$  Hz, 1H), 6.84 (d,  $J = 7.6$  Hz, 1H), 5.13 (d,  $J = 15.6$  Hz, 1H), 4.74 (d,  $J = 15.6$  Hz, 1H), 2.37 (d,  $J = 14.8$  Hz, 1H), 2.23 (d,  $J = 14.8$  Hz, 1H), 1.41 (s, 3H), 1.19 (s, 3H), 1.04 (s, 3H);  $^{13}\text{C NMR}$  (100 MHz,  $\text{CDCl}_3$ )  $\delta$  179.6, 142.2, 135.7, 130.8, 128.8, 128.6, 128.4, 127.6, 127.5, 124.8, 124.0, 122.4, 109.4, 46.9, 46.1, 44.0, 30.7, 29.6, 28.0, 26.3; IR (KBr):  $\tilde{\nu} = 2239, 1717, 1616, 1471, 1377, 1348$   $\text{cm}^{-1}$ ; HRMS  $m/z$  (ESI) calcd for  $\text{C}_{21}\text{H}_{22}\text{N}_2\text{O}^+$  [ $\text{M}^+$ ], 318.1732; found, 318.1729.

**3-(7-Bromo-1,3-dimethyl-2-oxoindolin-3-yl)-2,2-dimethylpropanenitrile and 3-(5-Bromo-1,3-dimethyl-2-oxoindolin-3-yl)-2,2-dimethylpropanenitrile (2v + 2v')**:

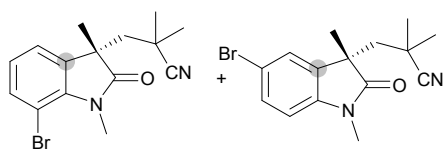

Colorless oil (40.5 mg, 63%);  $^1\text{H NMR}$  (400 MHz,  $\text{CDCl}_3$ )  $\delta$  7.467.41 (m, 2.5H), 7.23 (d,  $J = 7.3$  Hz, 0.5H), 6.94 (t,  $J = 7.8$  Hz, 0.5H), 6.78 (d,  $J = 8.2$  Hz, 1H), 3.62 (s, 1.5H), 3.22 (s, 3H), 2.34-2.29 (m, 1.56H), 2.17-2.08 (m, 1.65H), 1.34 (d,  $J = 4.3$  Hz, 4.5H), 1.19 (s, 1.5H), 1.15 (s, 3H), 1.11 (s, 3H), 1.08 (s, 1.5H);  $^{13}\text{C NMR}$  (100 MHz,  $\text{CDCl}_3$ )  $\delta$  180, 178.9, 142.2, 140.4, 134.3, 133.9, 133.1, 131.4, 127.7, 123.8, 123.7, 123.6, 115.2, 109.9, 102.8, 47.2, 46.7, 46.5, 46.5, 30.6, 30.0, 29.8, 29.5, 27.8, 27.2, 27.1, 26.4, 26.3, 25.1; IR (KBr):  $\tilde{\nu} = 2236, 1723, 1614, 1477, 1378, 1339$   $\text{cm}^{-1}$ ; HRMS  $m/z$  (ESI) calcd for  $\text{C}_{15}\text{H}_{17}\text{BrN}_2\text{O}^+$  [ $\text{M}^+$ ], 320.0525; found, 320.0528; HRMS  $m/z$  (ESI) calcd for  $\text{C}_{15}\text{H}_{17}^{81}\text{BrN}_2\text{O}^+$  [ $\text{M}^+$ ], 322.0505; found, 322.0504.

### 2-((1,3-Dimethyl-2-oxindolin-3-yl)methyl)-2-methylbutanenitrile (3):

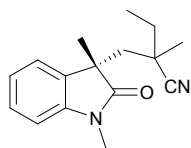

White solid (43.6 mg, 85%); mp 124-125 °C; <sup>1</sup>H NMR (400 MHz, CDCl<sub>3</sub>) δ 7.37-7.28 (m, 2H), 7.15-7.07 (m, 1H), 6.91 (d, *J* = 7.8 Hz, 1H), 3.25 (s, 3H), 2.43 (d, *J* = 14.6 Hz, 1H), 2.25 (q, *J* = 14.7 Hz, 1H), 2.04 (d, *J* = 14.6 Hz, 1H), 1.56-1.49 (m, 1H), 1.45-1.33 (m, 4H), 1.01-0.93 (m, 6H); <sup>13</sup>C NMR (100 MHz, CDCl<sub>3</sub>) δ 179.9, 179.4, 143.2, 142.9, 131.3, 130.7, 128.5, 128.4, 124.8, 124.1, 123.1, 122.6, 122.4, 122.1, 108.5, 108.3, 46.8, 46.7, 45.2, 44.3, 35.5, 35.3, 35.1, 33.1, 27.7, 27.4, 26.3, 26.2, 25.7, 22.6, 9.0, 8.9; IR (KBr):  $\tilde{\nu}$  = 2233, 1719, 1608, 1467, 1370, 1337 cm<sup>-1</sup>; HRMS *m/z* (ESI) calcd for C<sub>16</sub>H<sub>20</sub>N<sub>2</sub>O<sup>+</sup> [M<sup>+</sup>], 256.1576; found, 256.1578.

### References

- [S1] T. Wu, X. Mu and G. S. Liu, *Angew. Chem., Int. Ed.*, 2011, **123**, 12786; *Angew. Chem.*, 2011, **50**, 12578.
- [S2] (a) W. Kong, M. Casimiro, E. Merino and C. Nevado, *J. Am. Chem. Soc.*, 2013, **135**, 14480; (b) N. Fuentes, W. Q. Kong, L. Fernández-Sánchez, E. Merino and C. Nevado, *J. Am. Chem. Soc.*, 2015, **137**, 964; (c) J.-H. Fan, J. Yang, R.-J. Song and J.-H. Li, *Org. Lett.*, 2015, **17**, 836; (d) W. Kong, M. Casimiro, N. Fuentes, E. Merino and C. Nevado, *Angew. Chem., Int. Ed.*, 2013, **52**, 13086; *Angew. Chem.*, 2013, **125**, 13324; (e) J. Streuff, *Chem. - Eur. J.* 2011, **17**, 5507.

# NMR Spectra

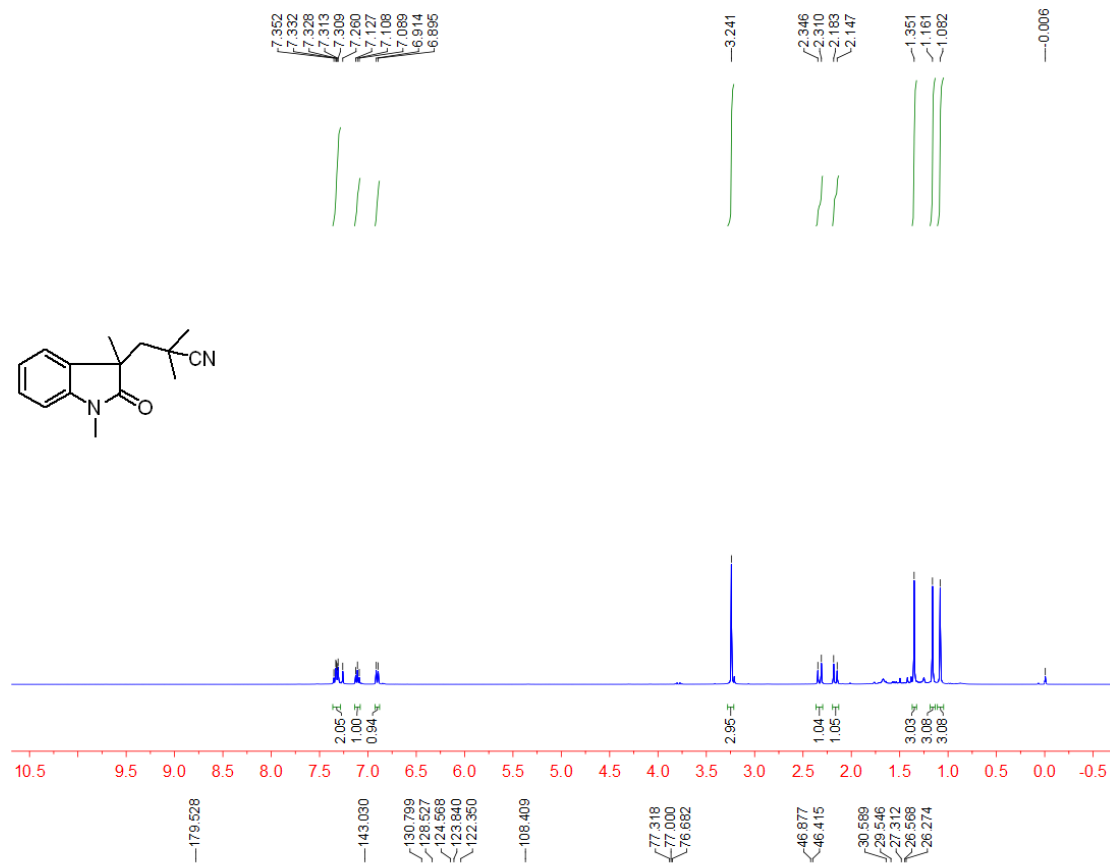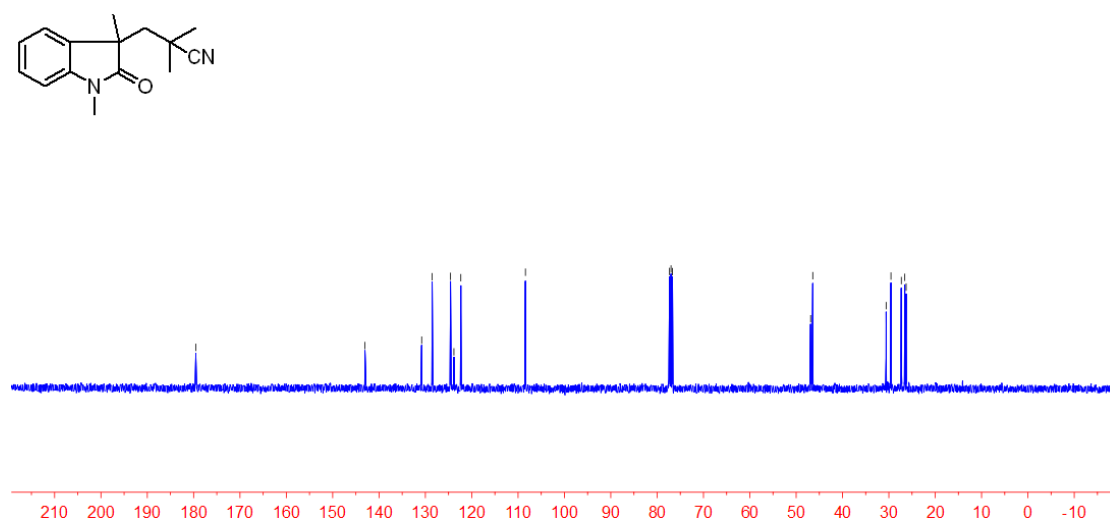

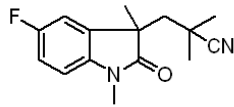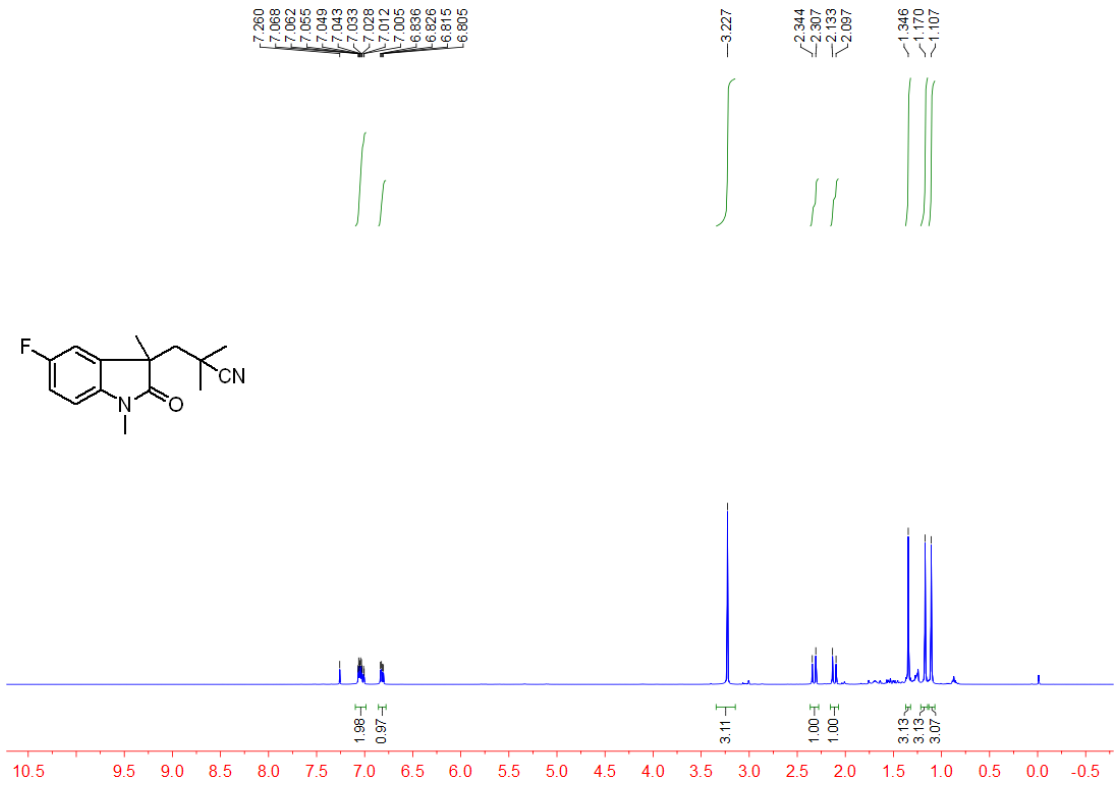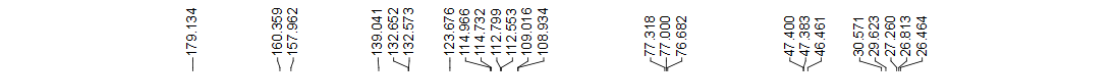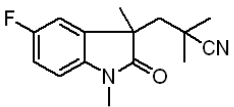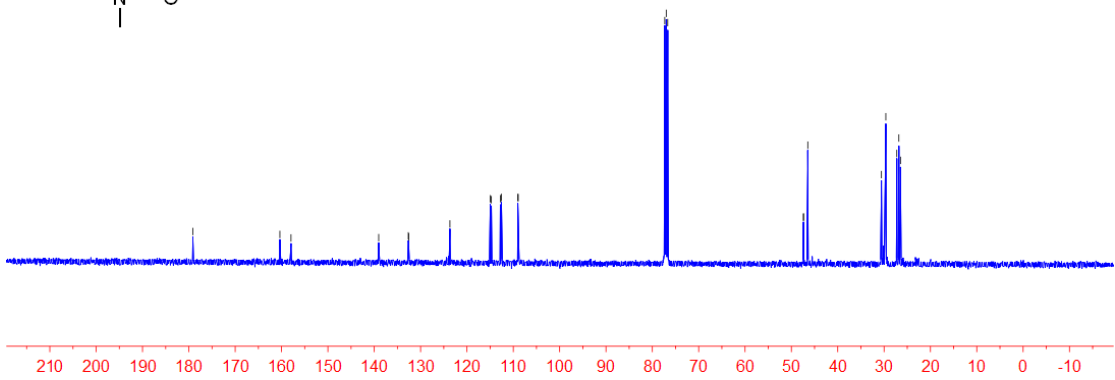

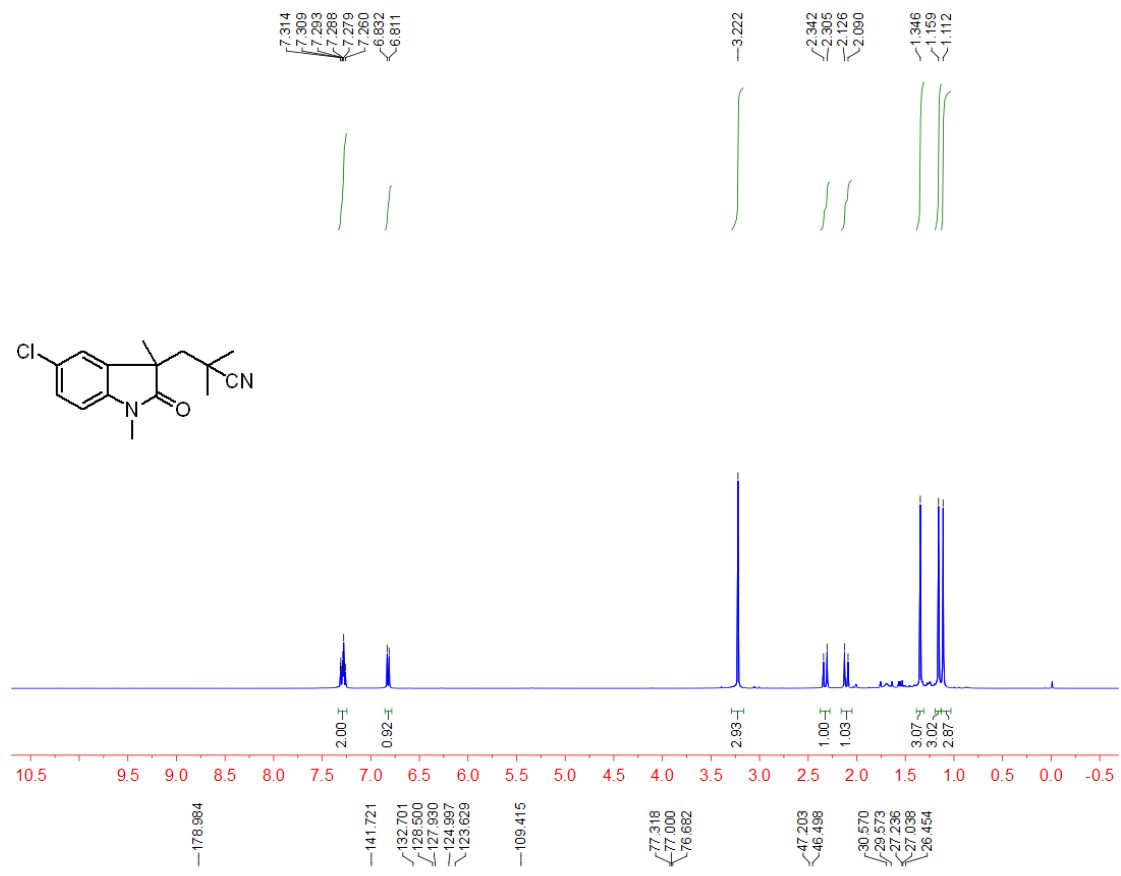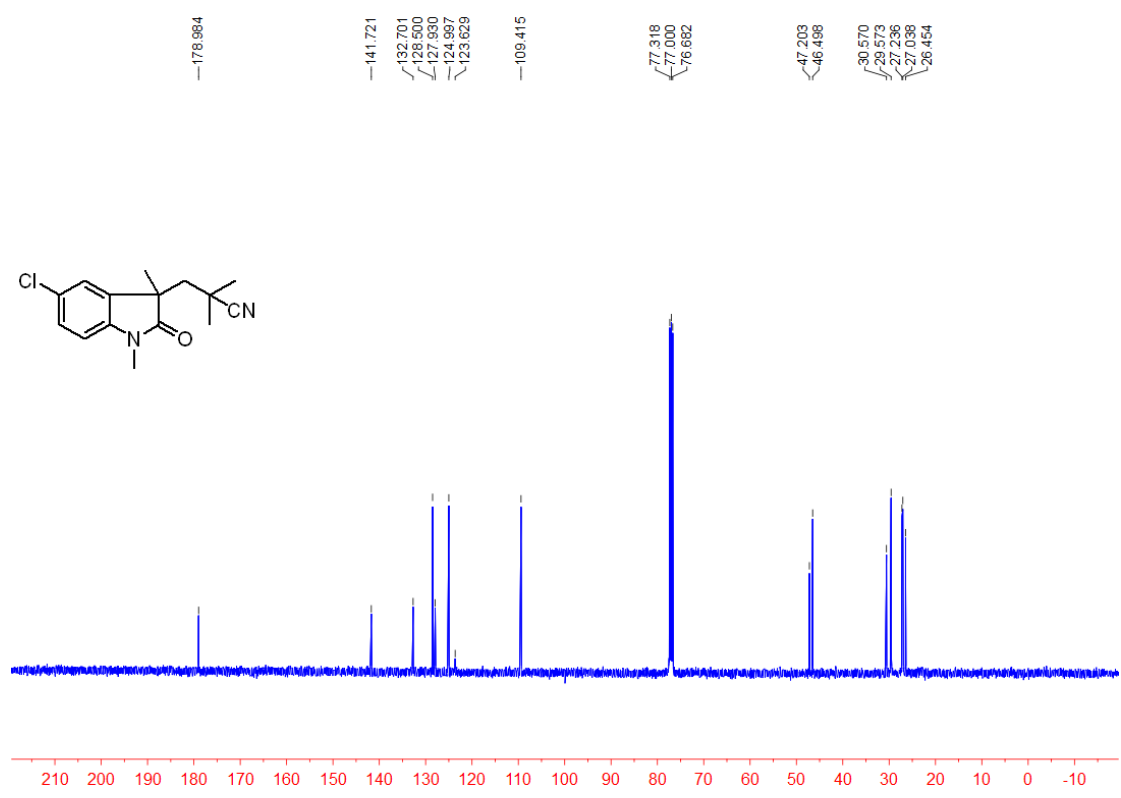

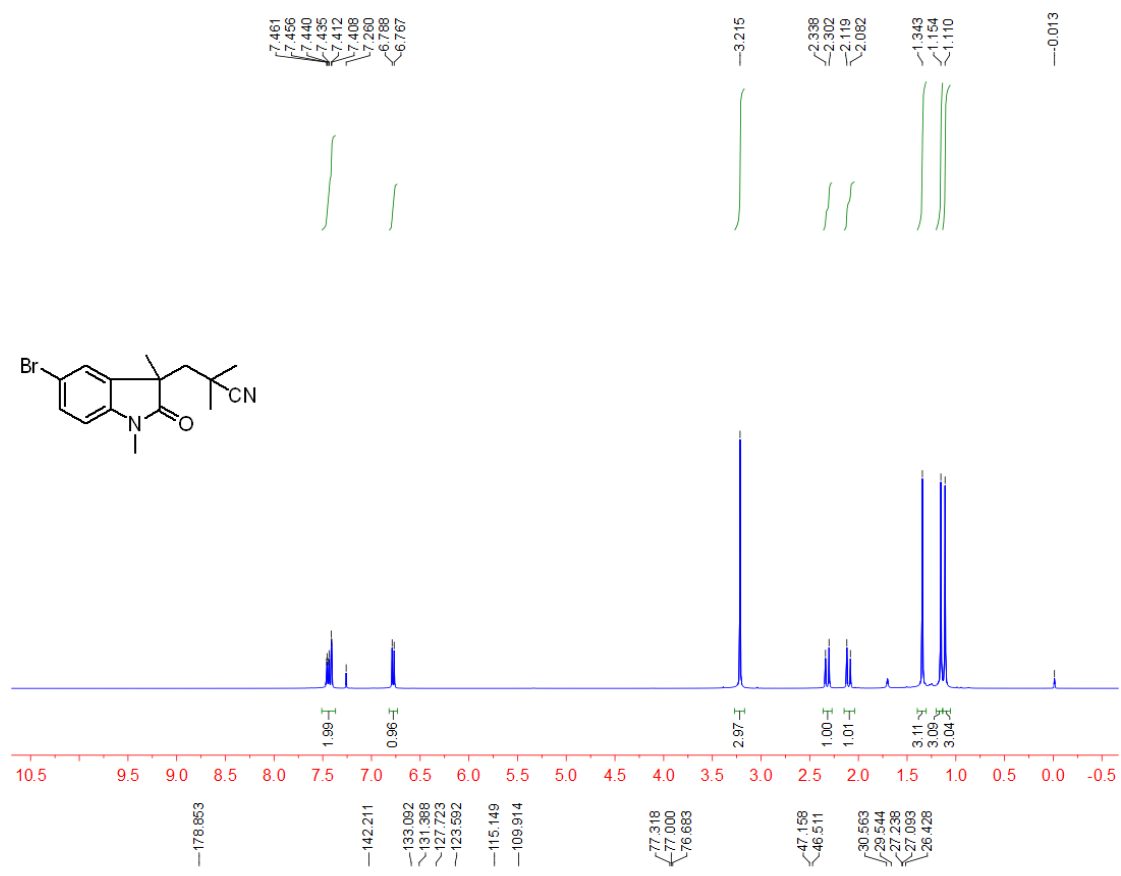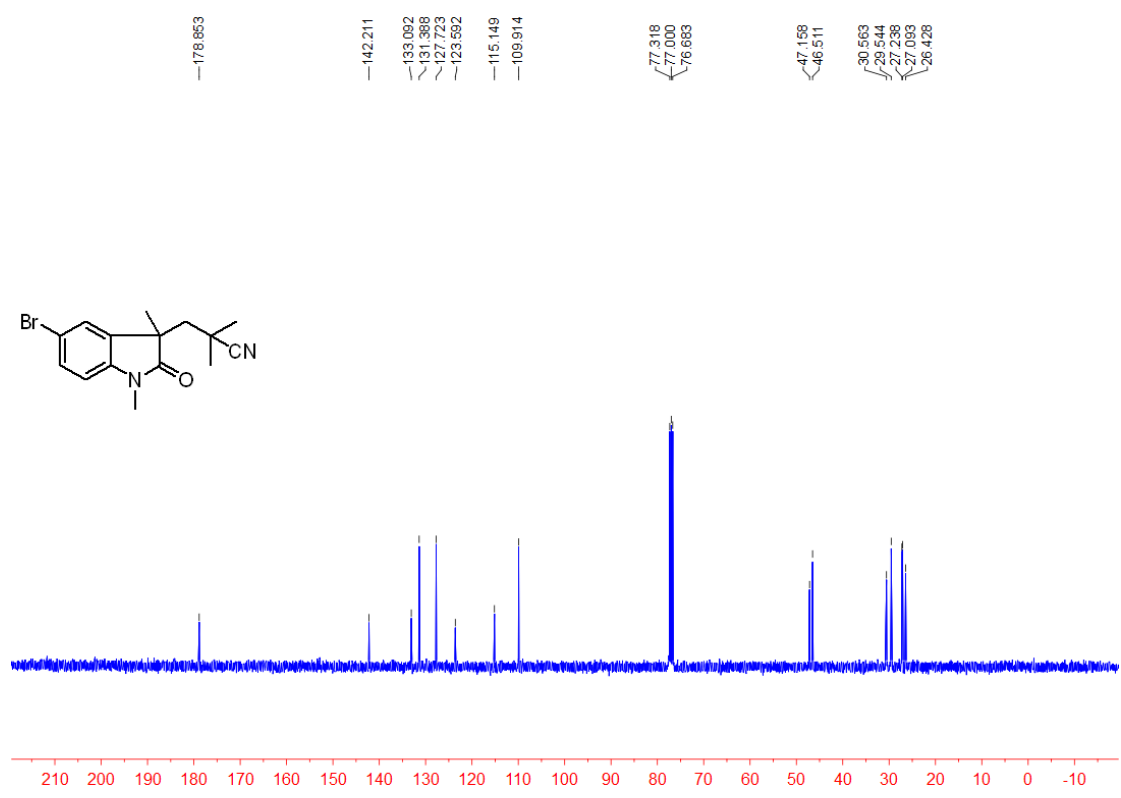



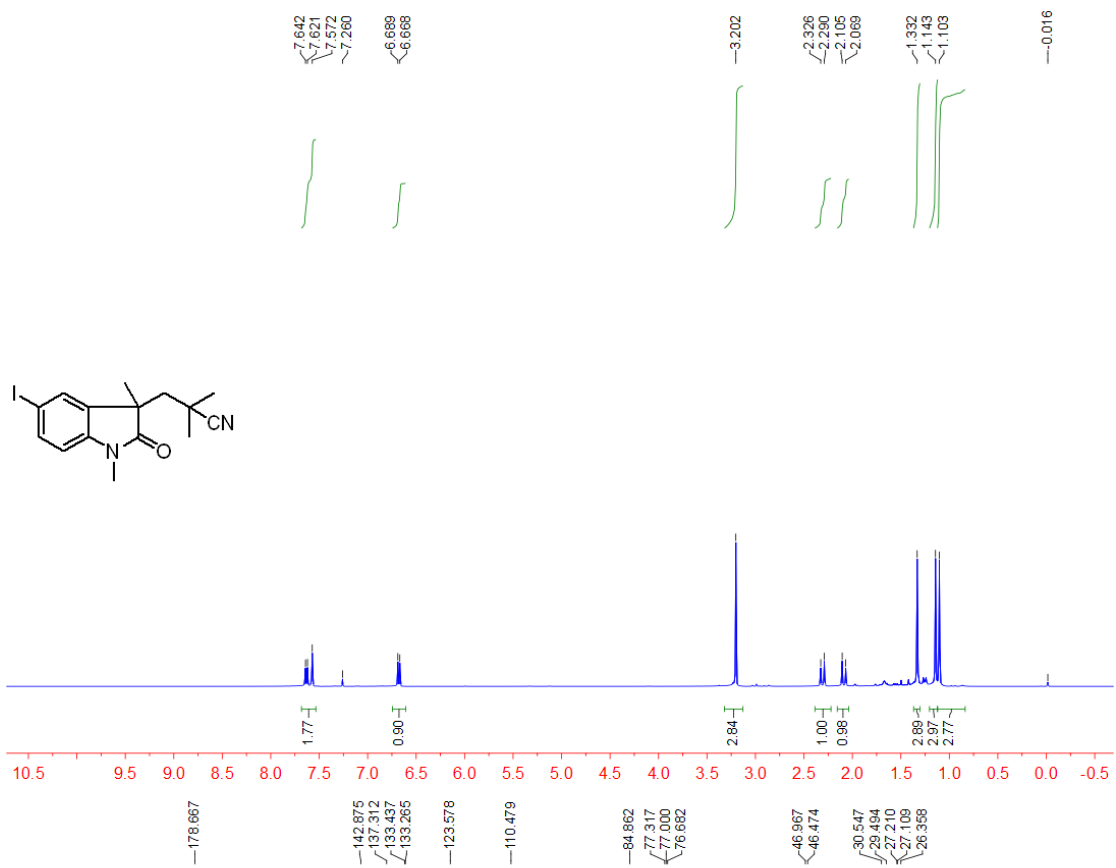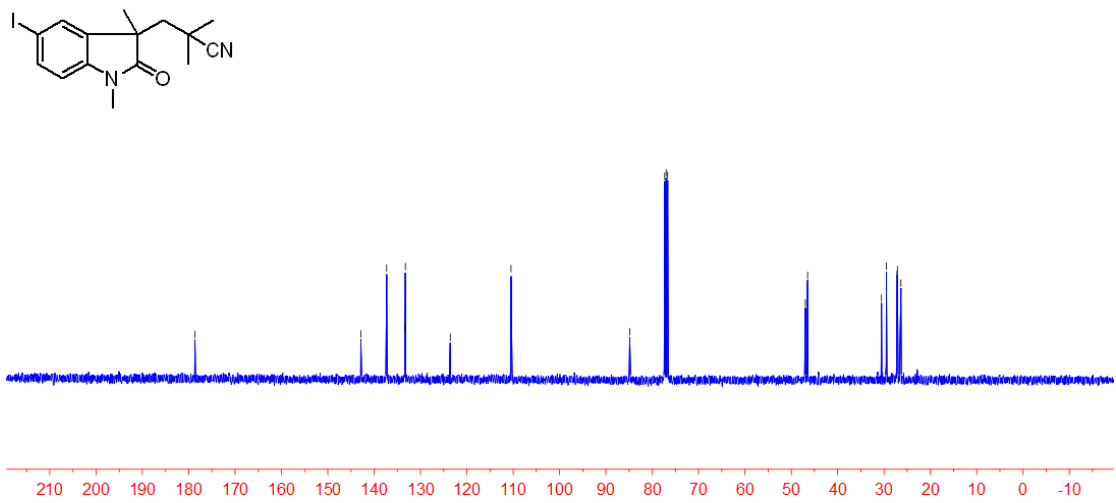

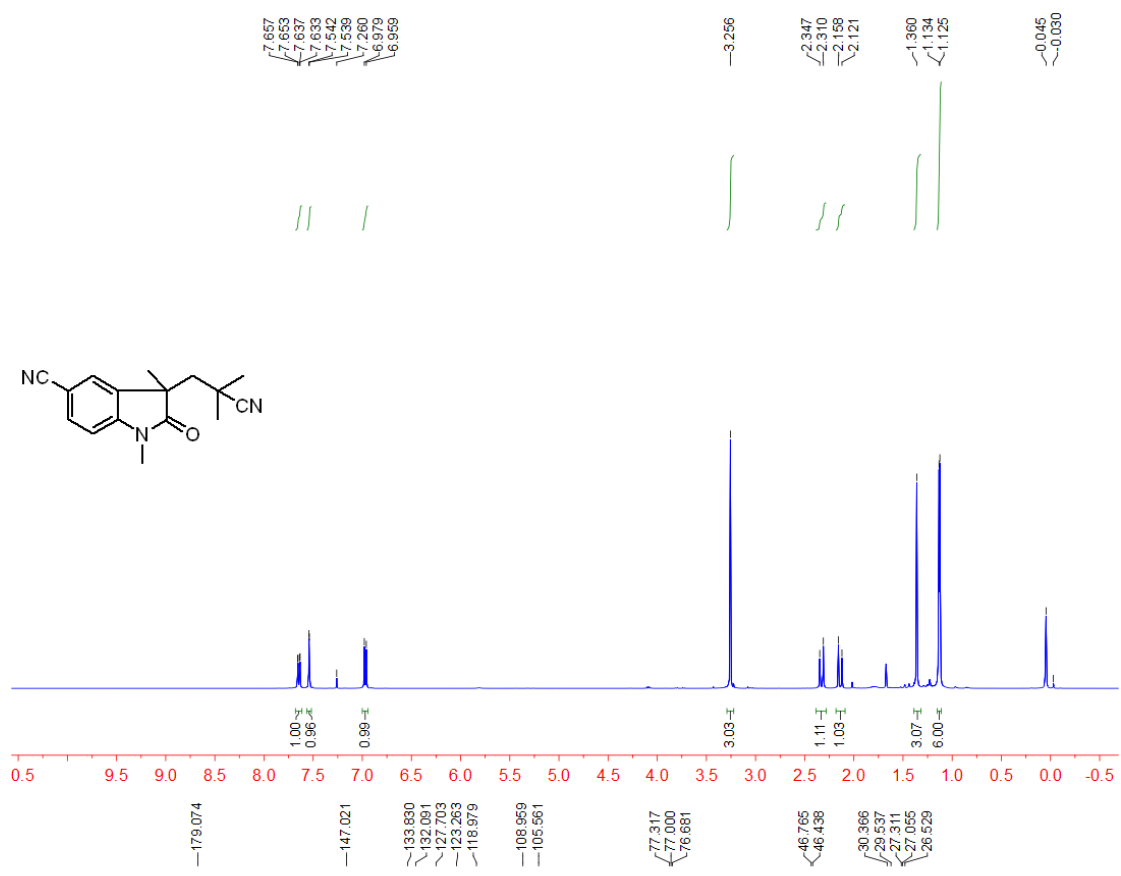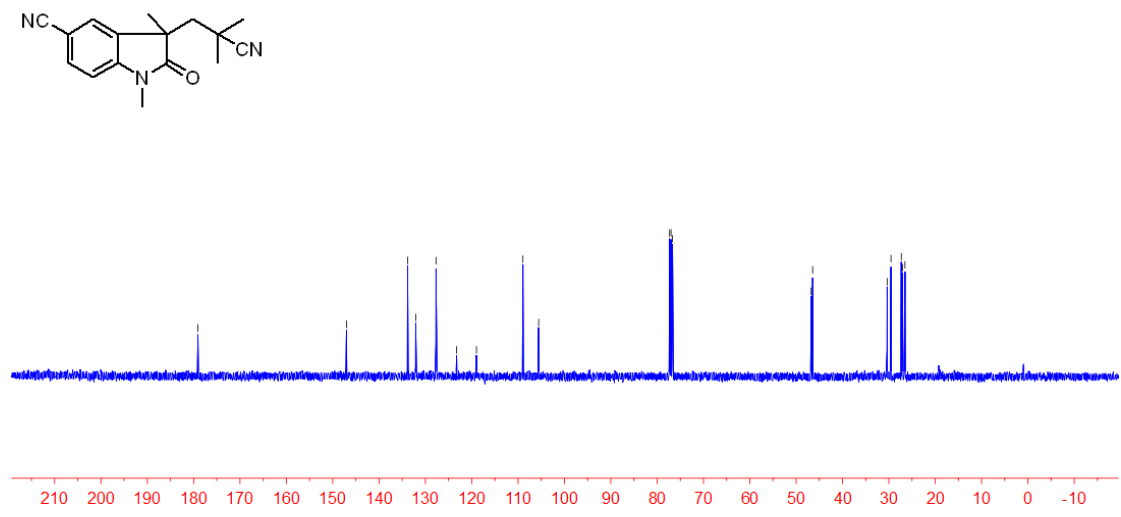

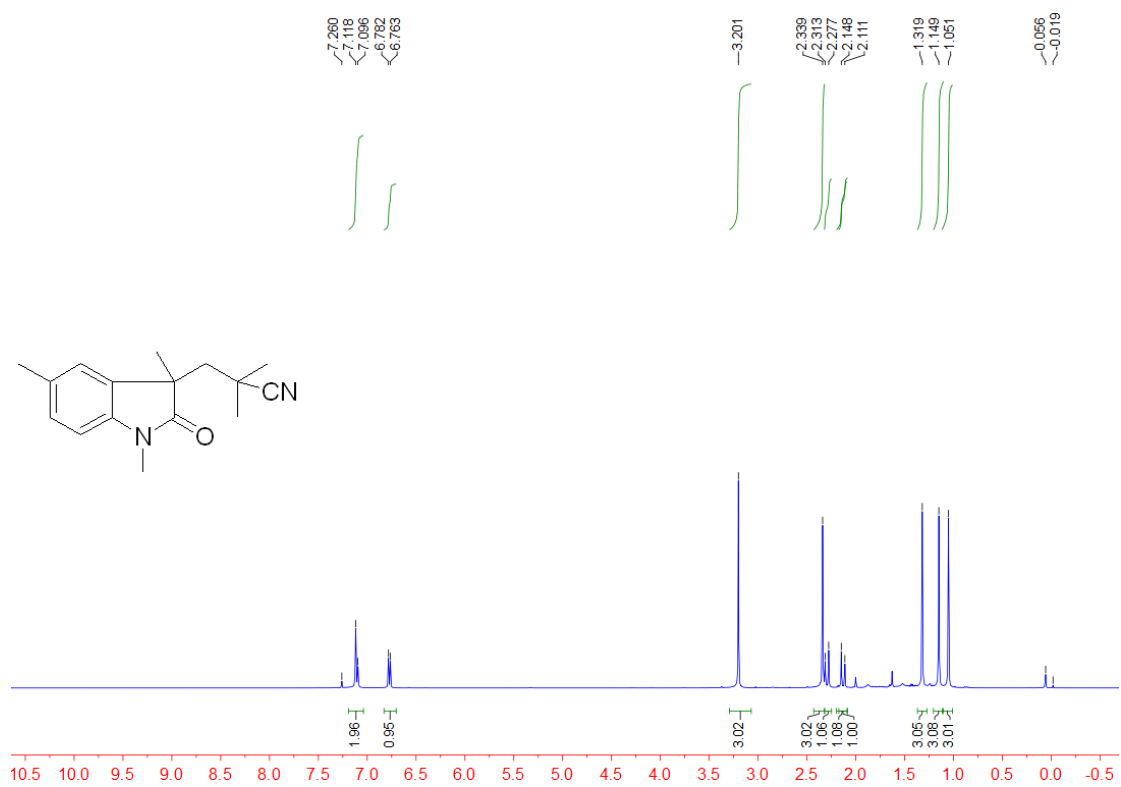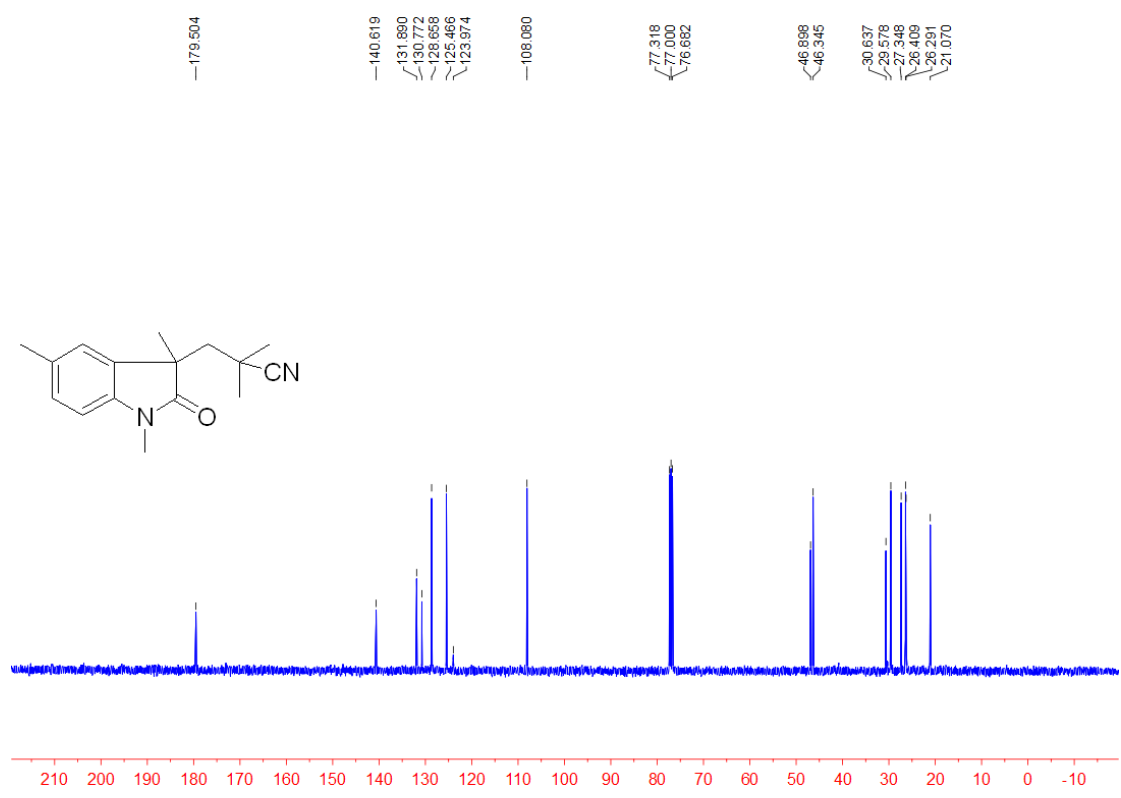

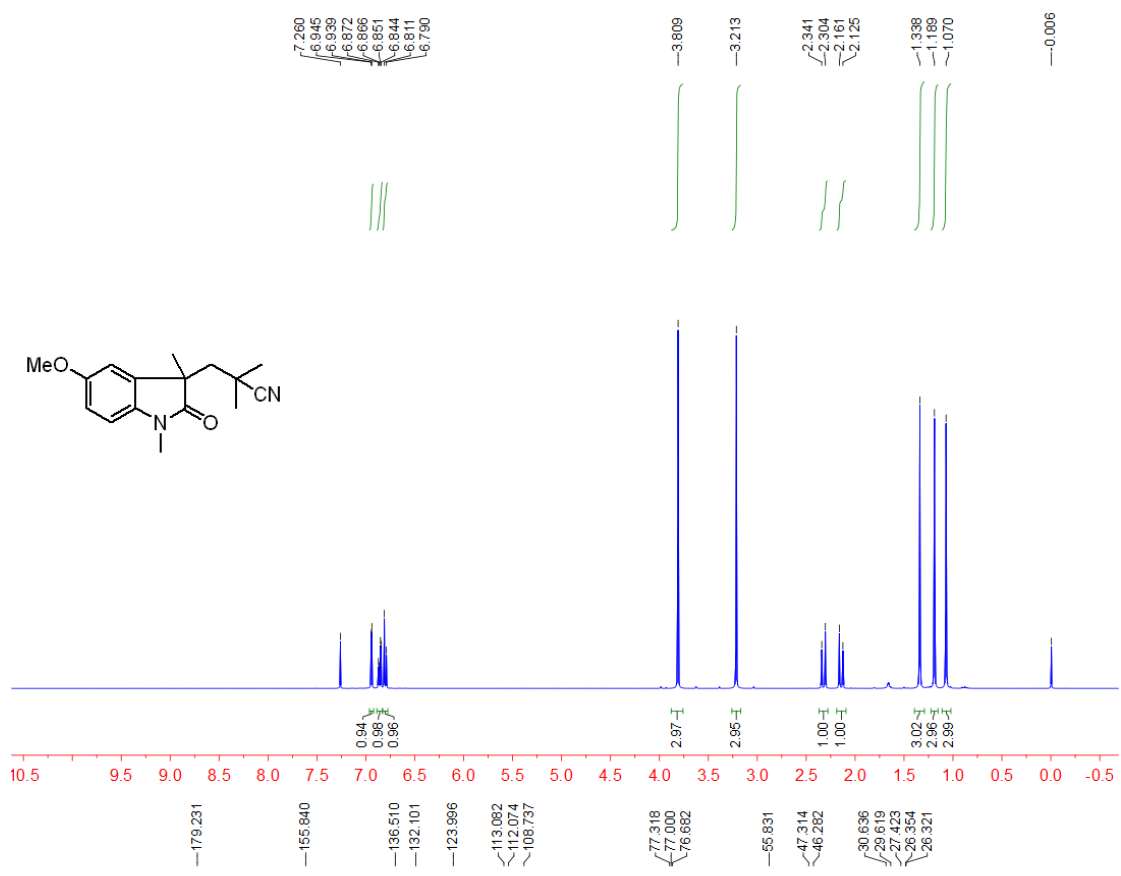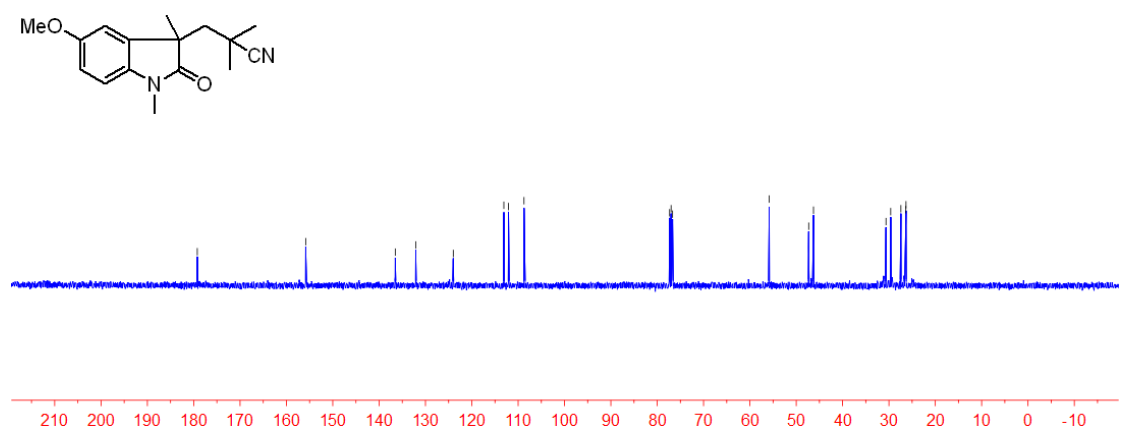

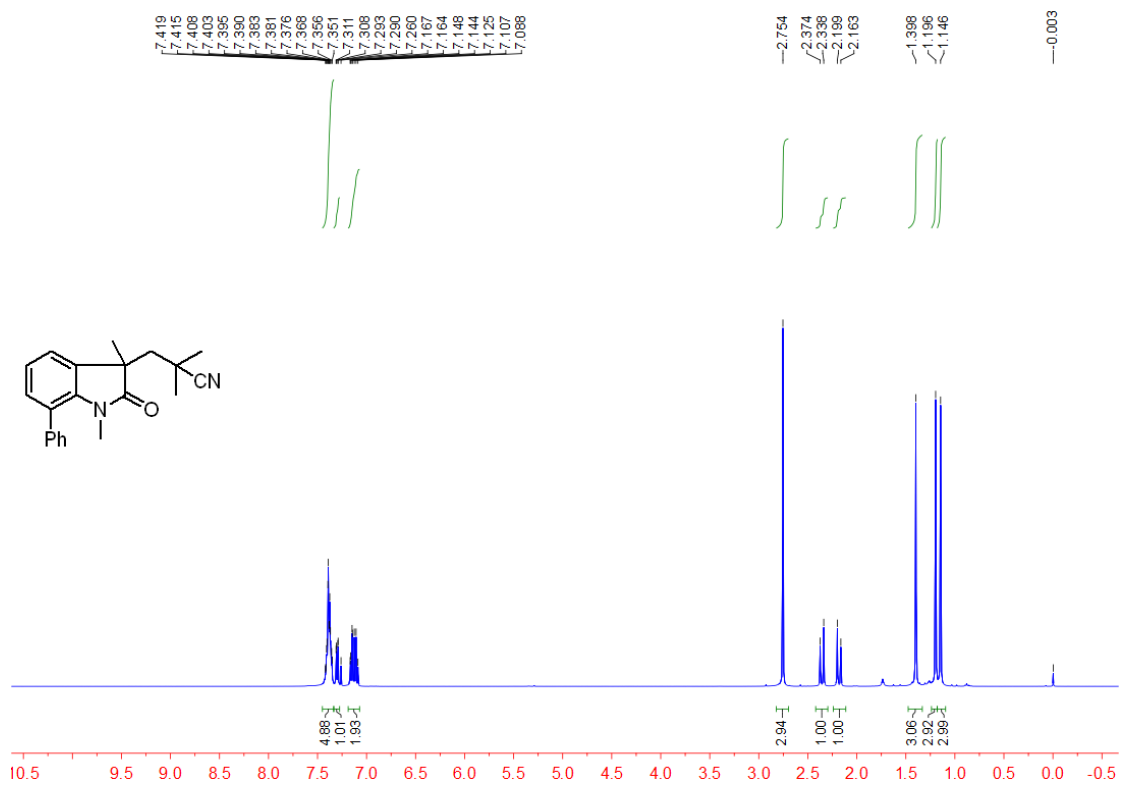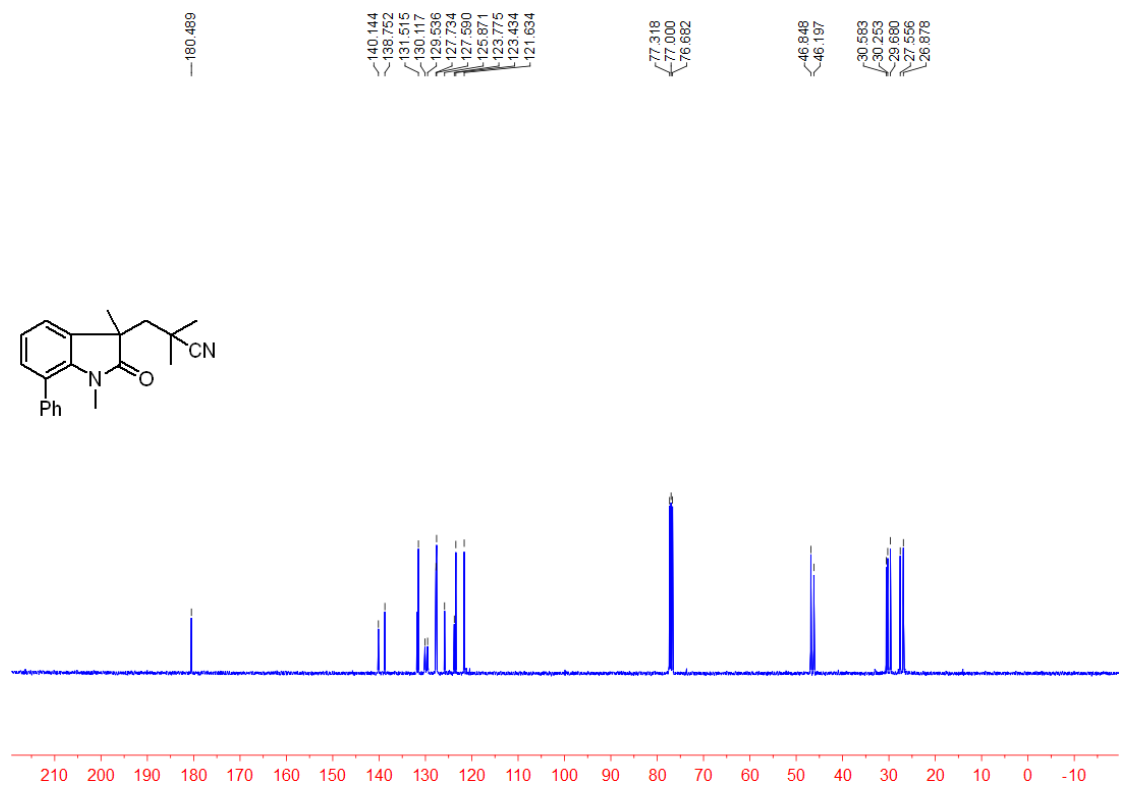

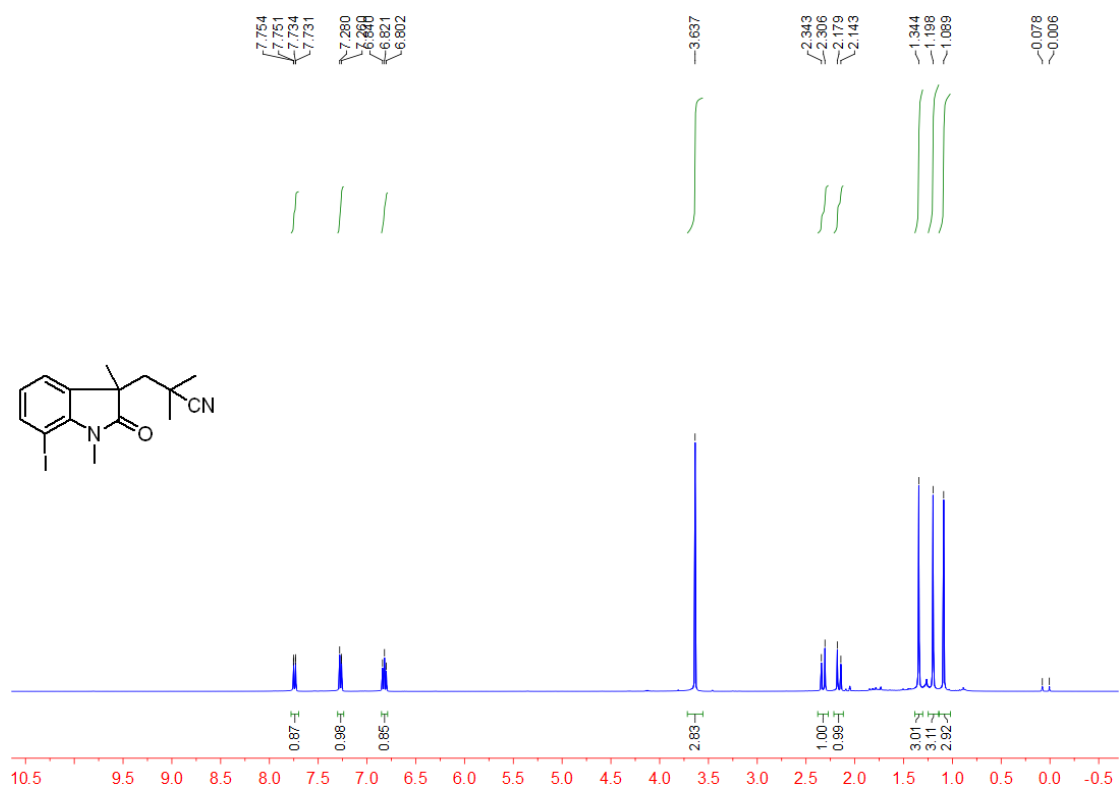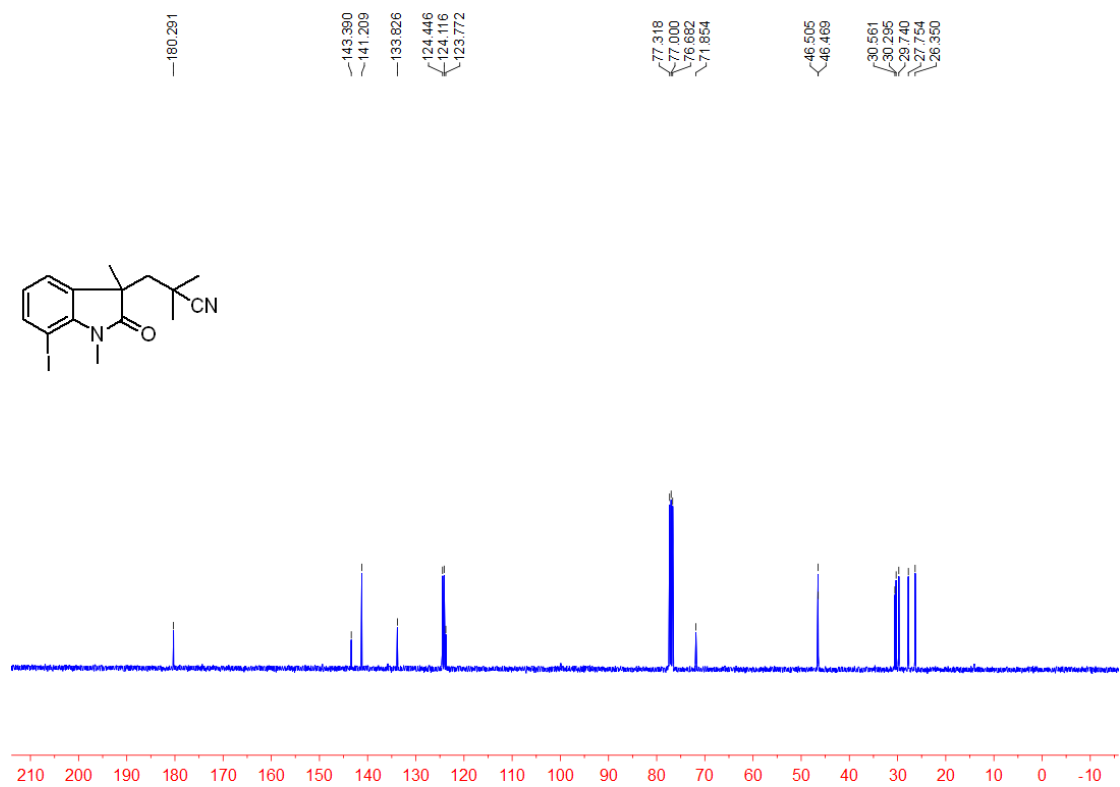

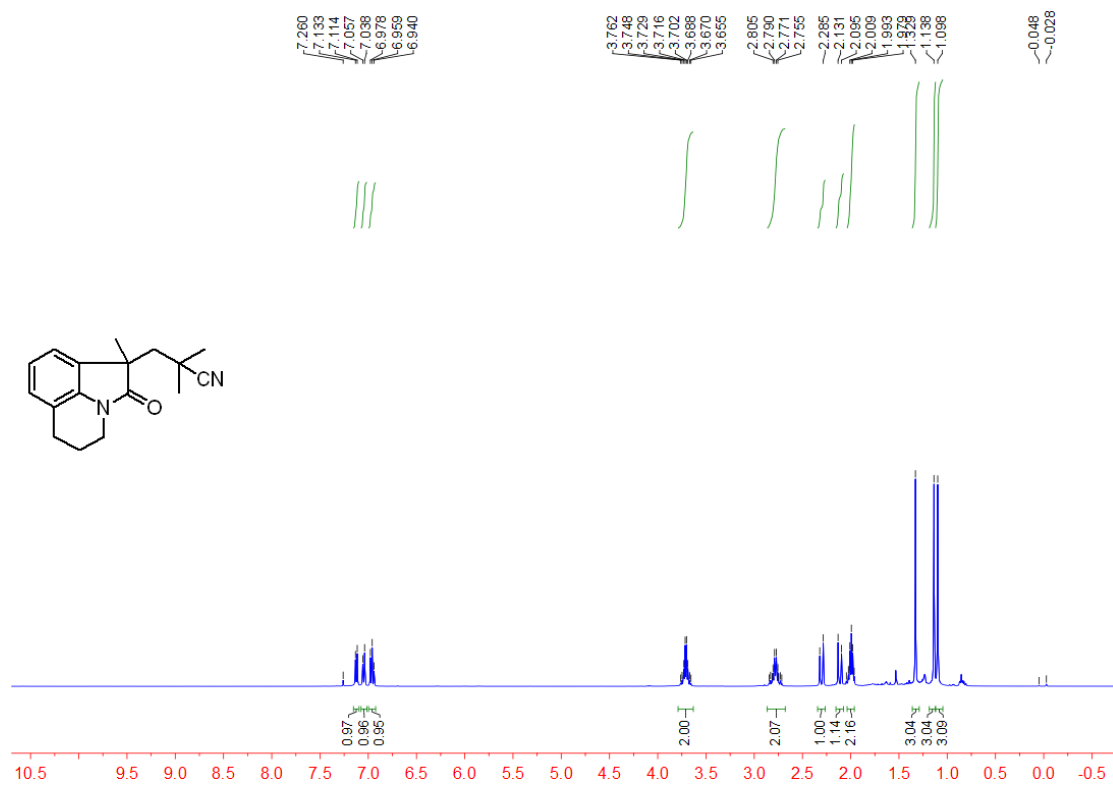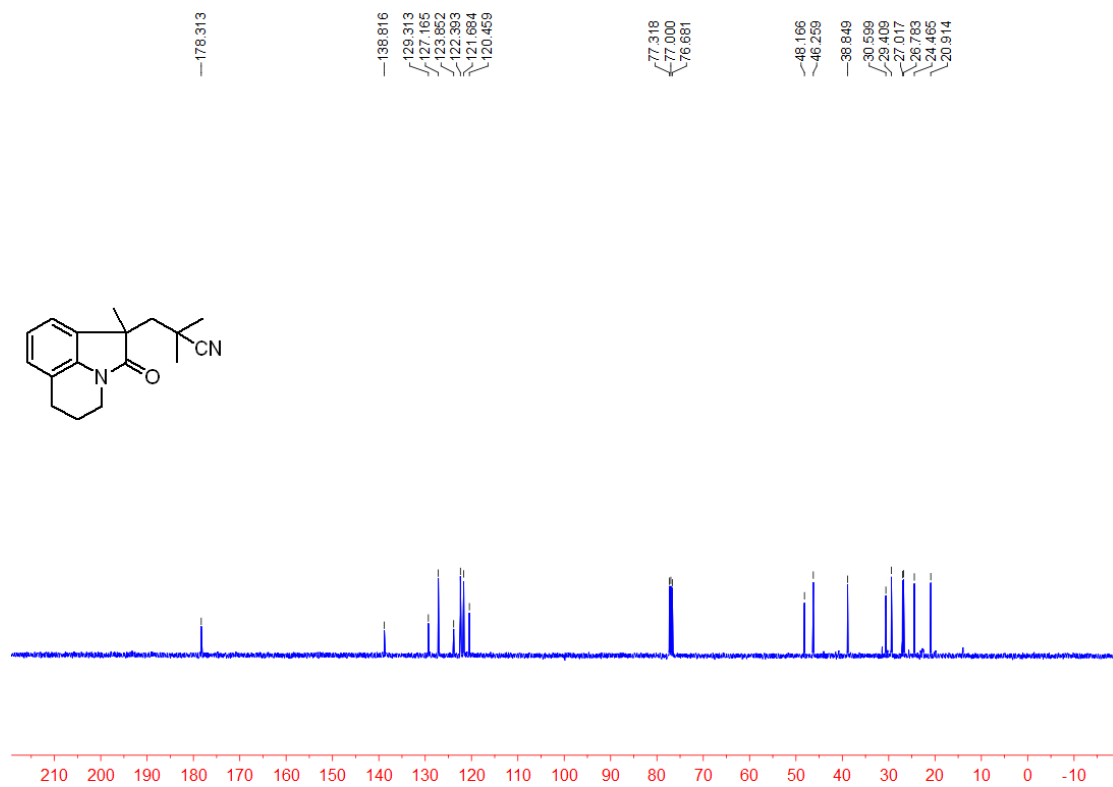

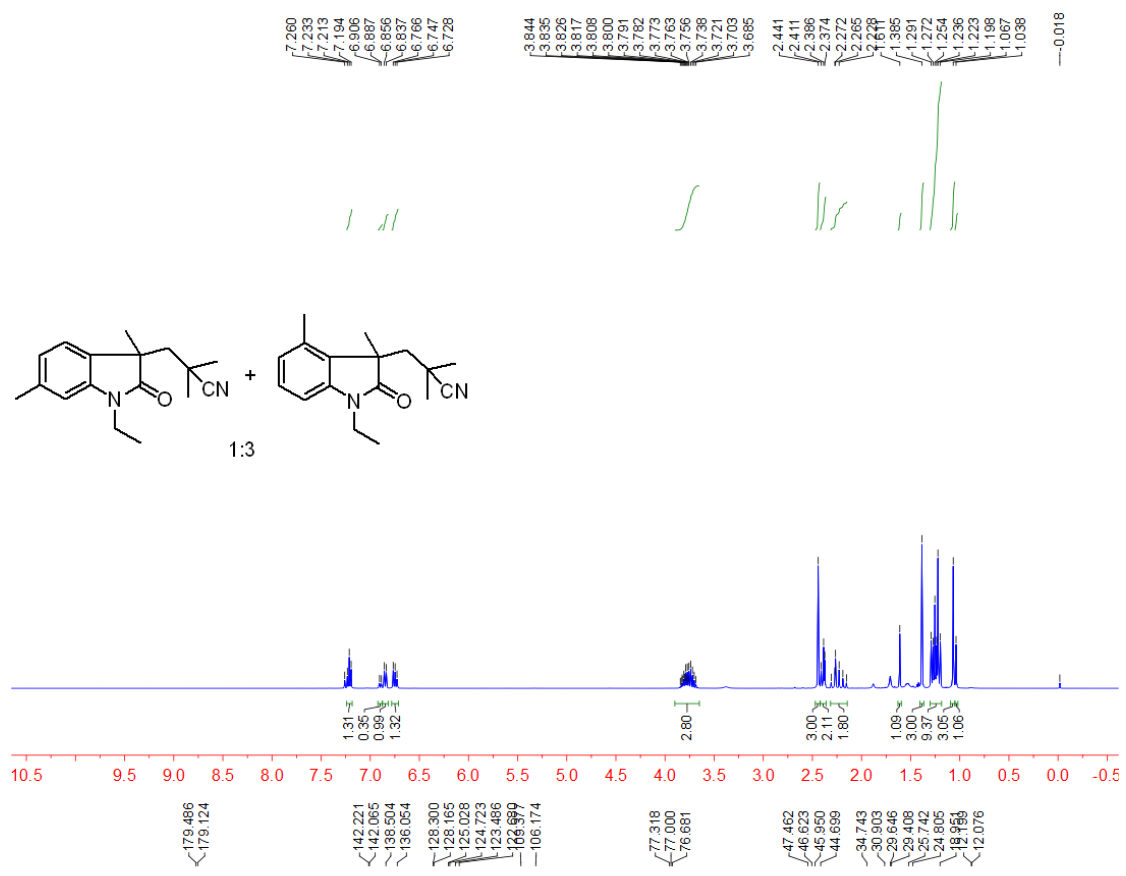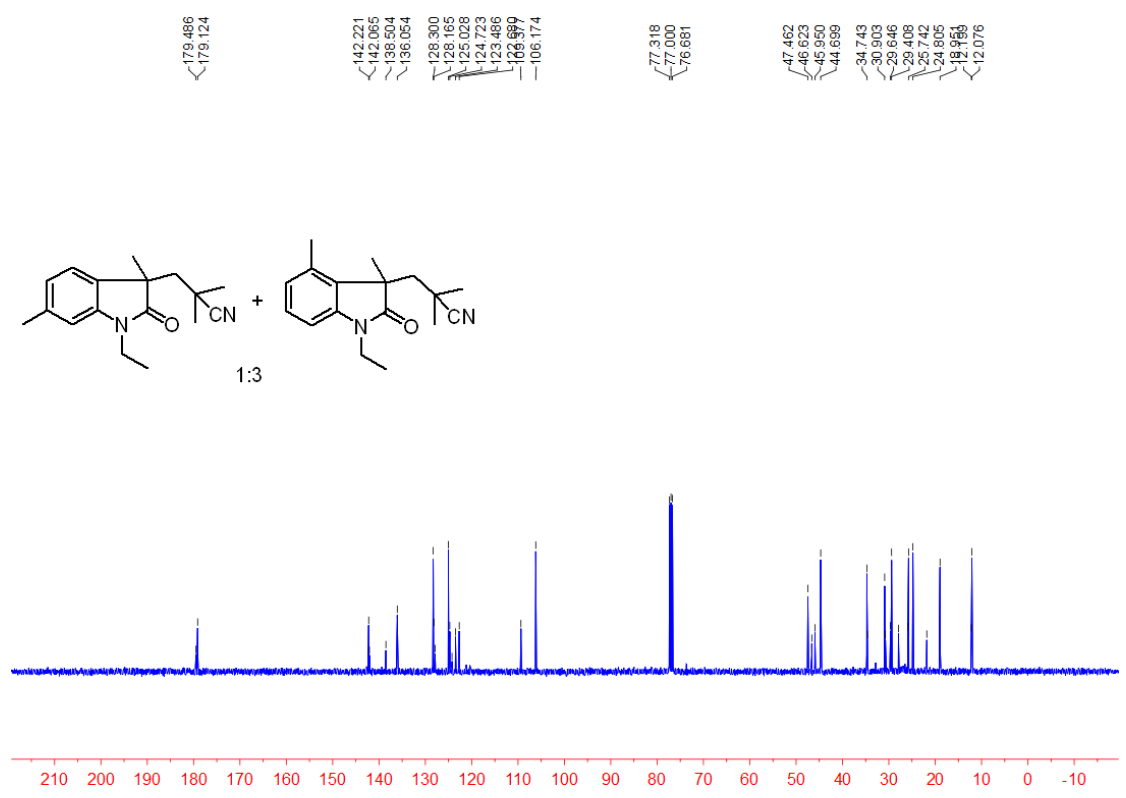



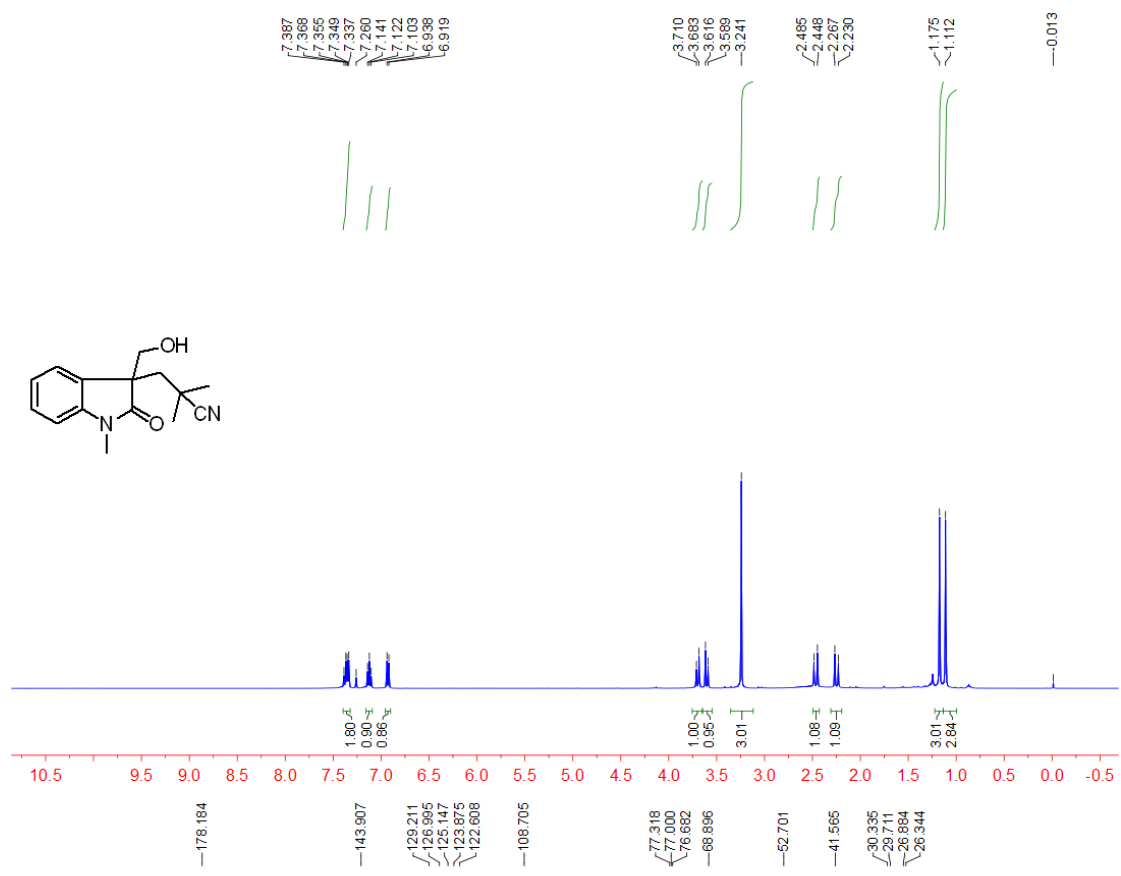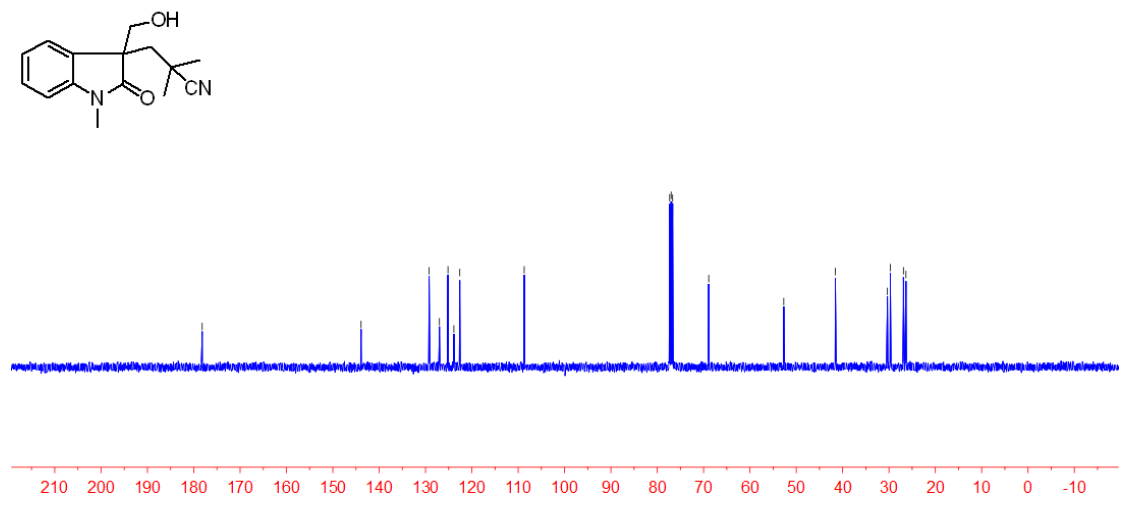

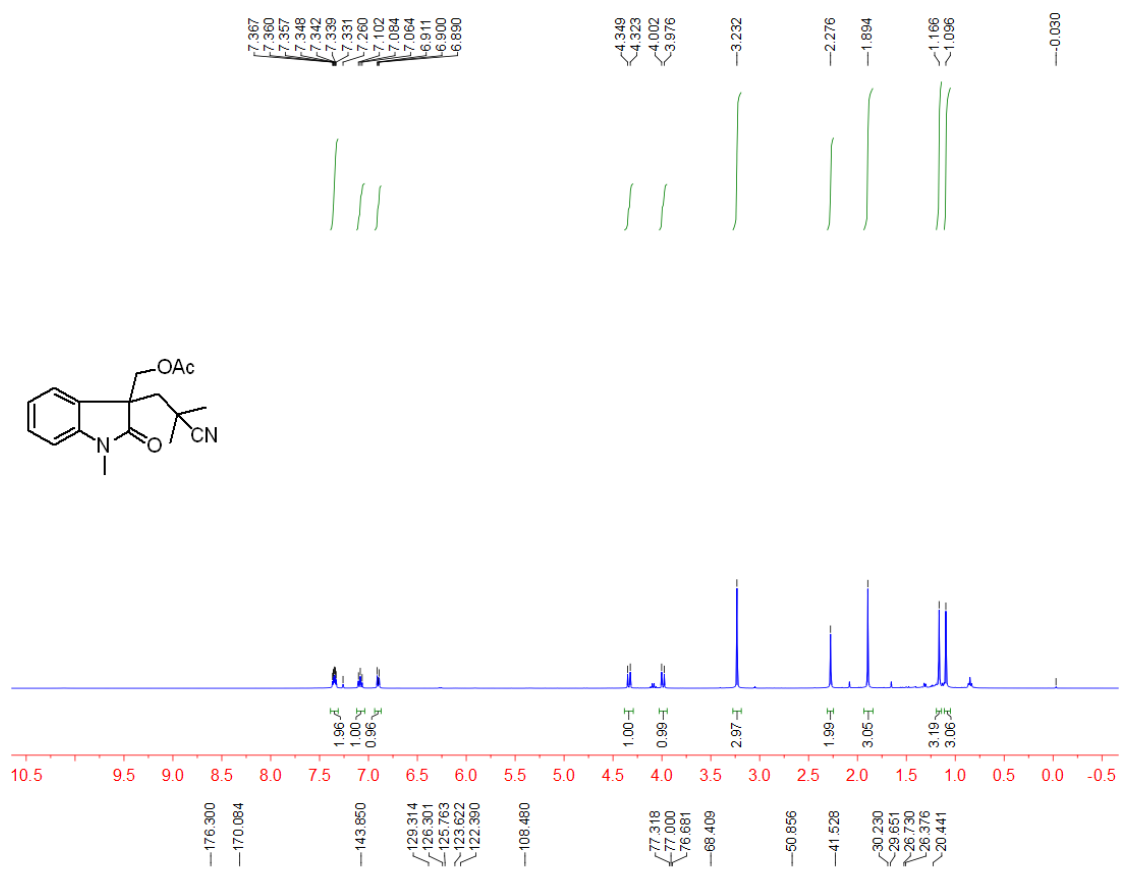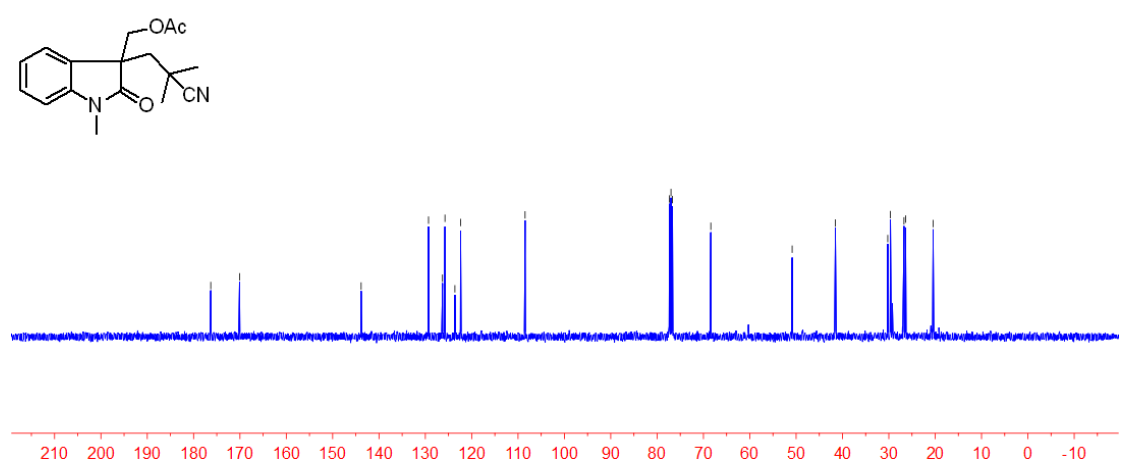

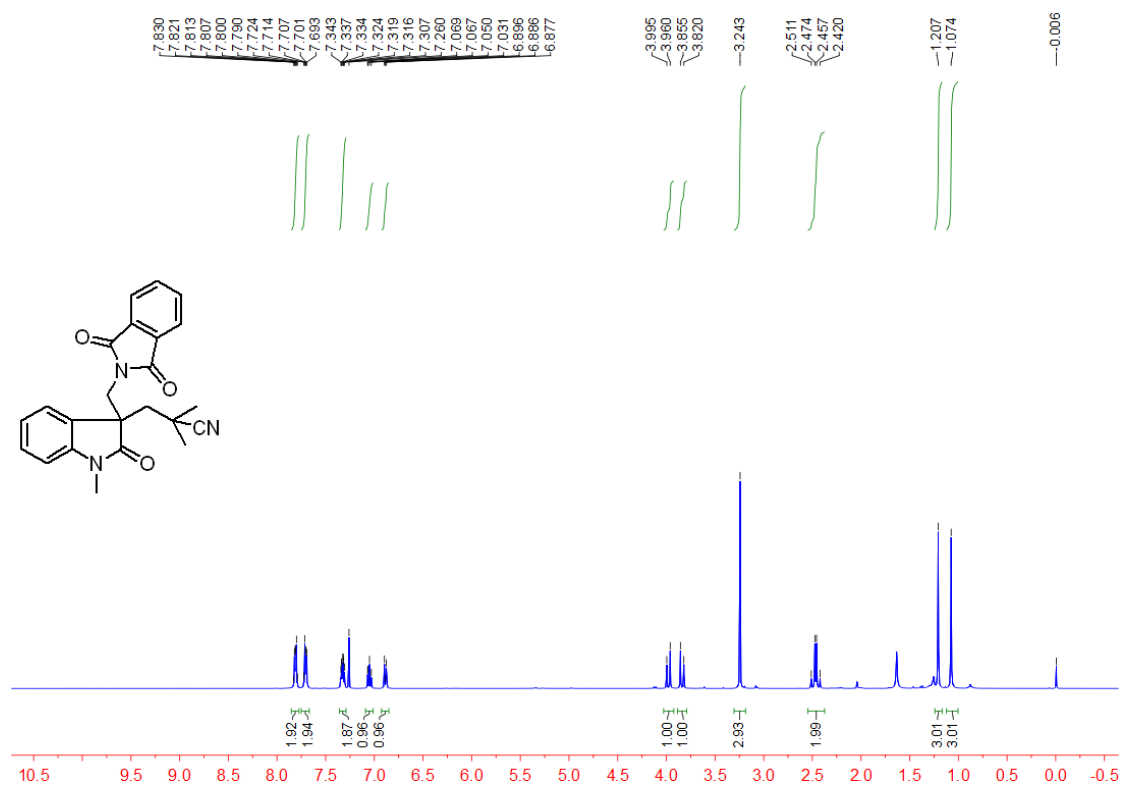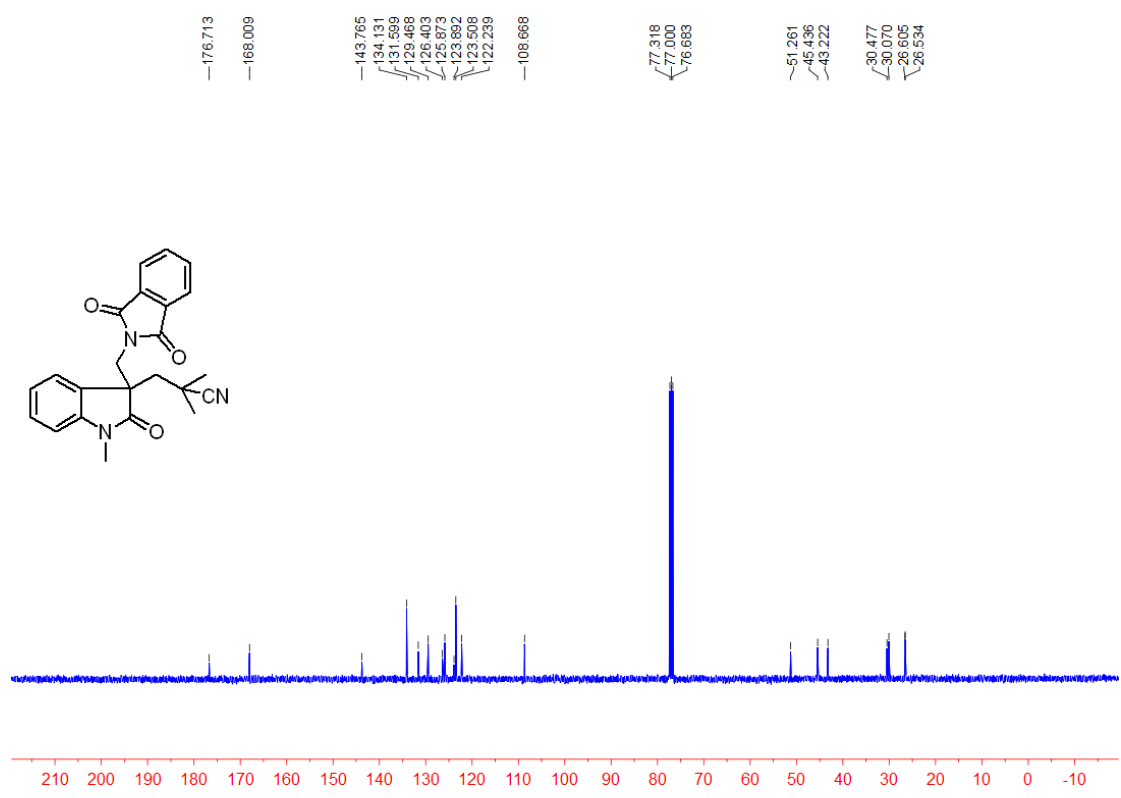

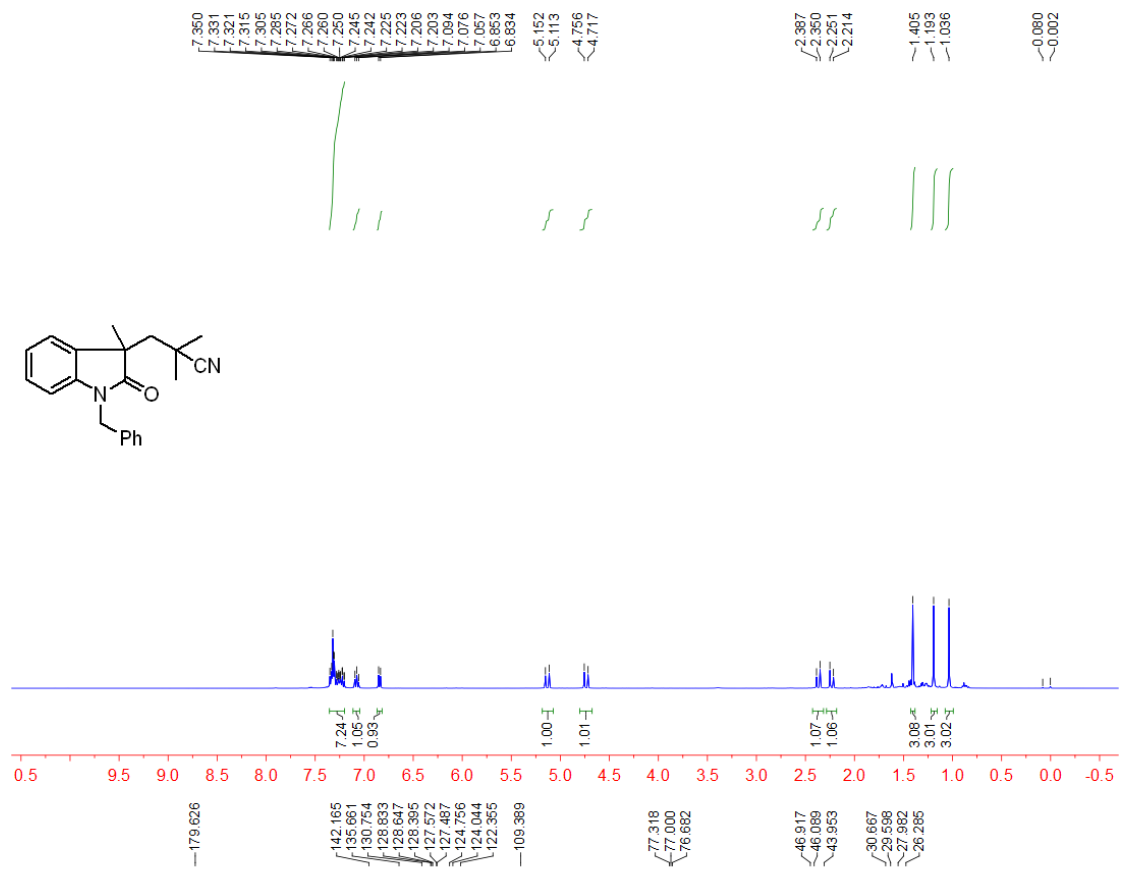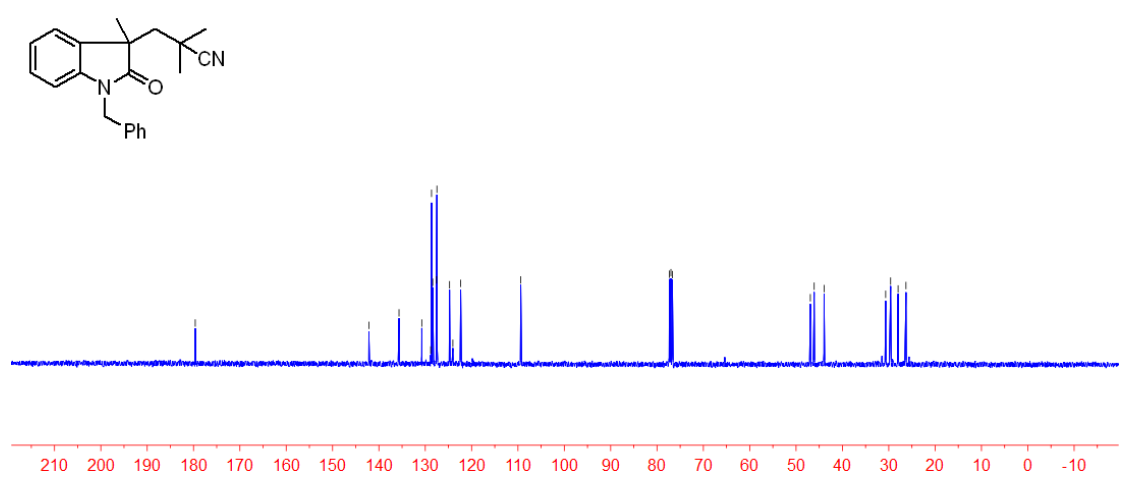

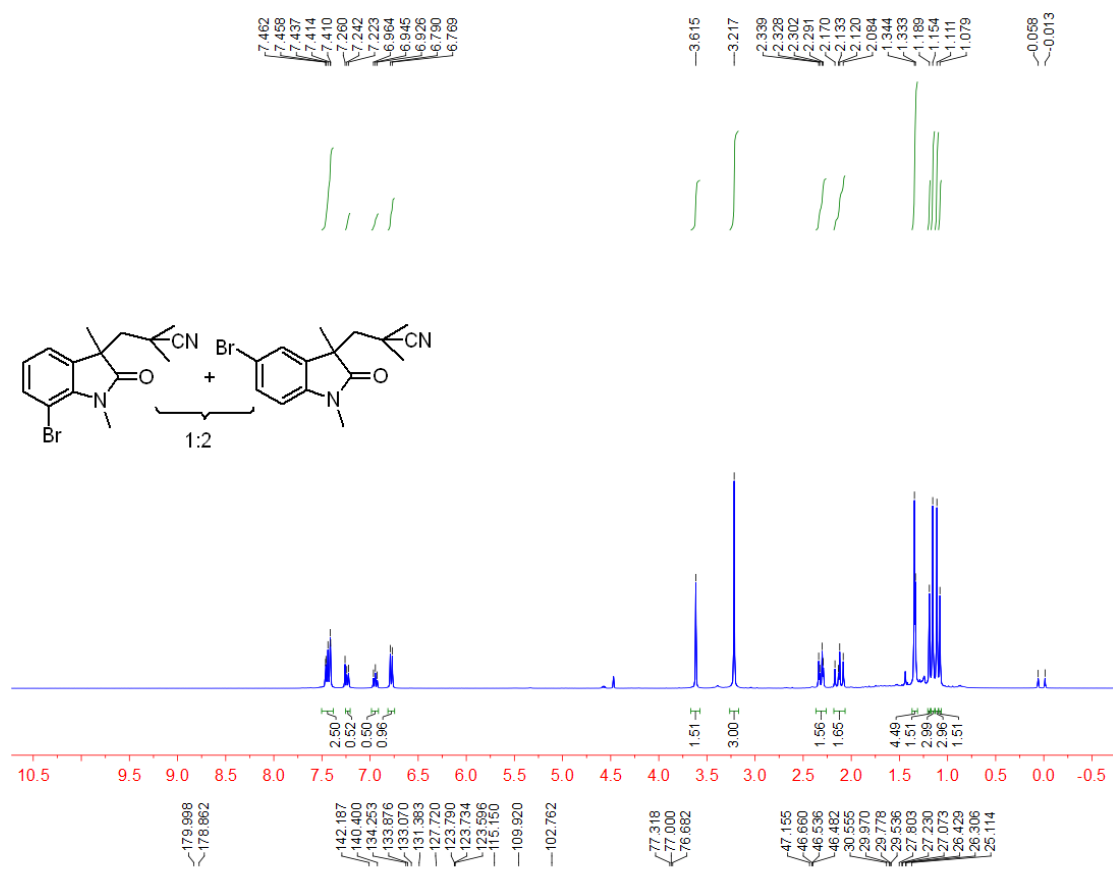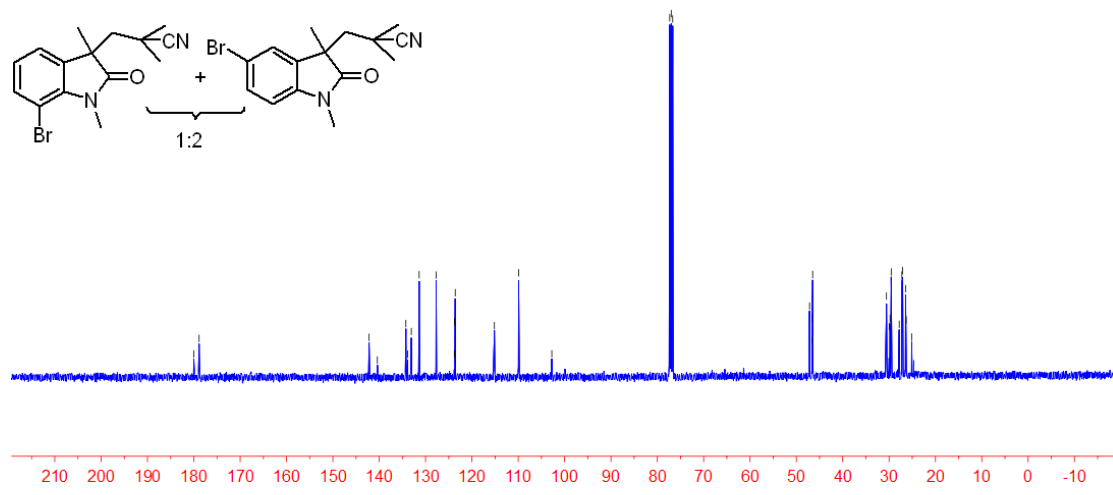

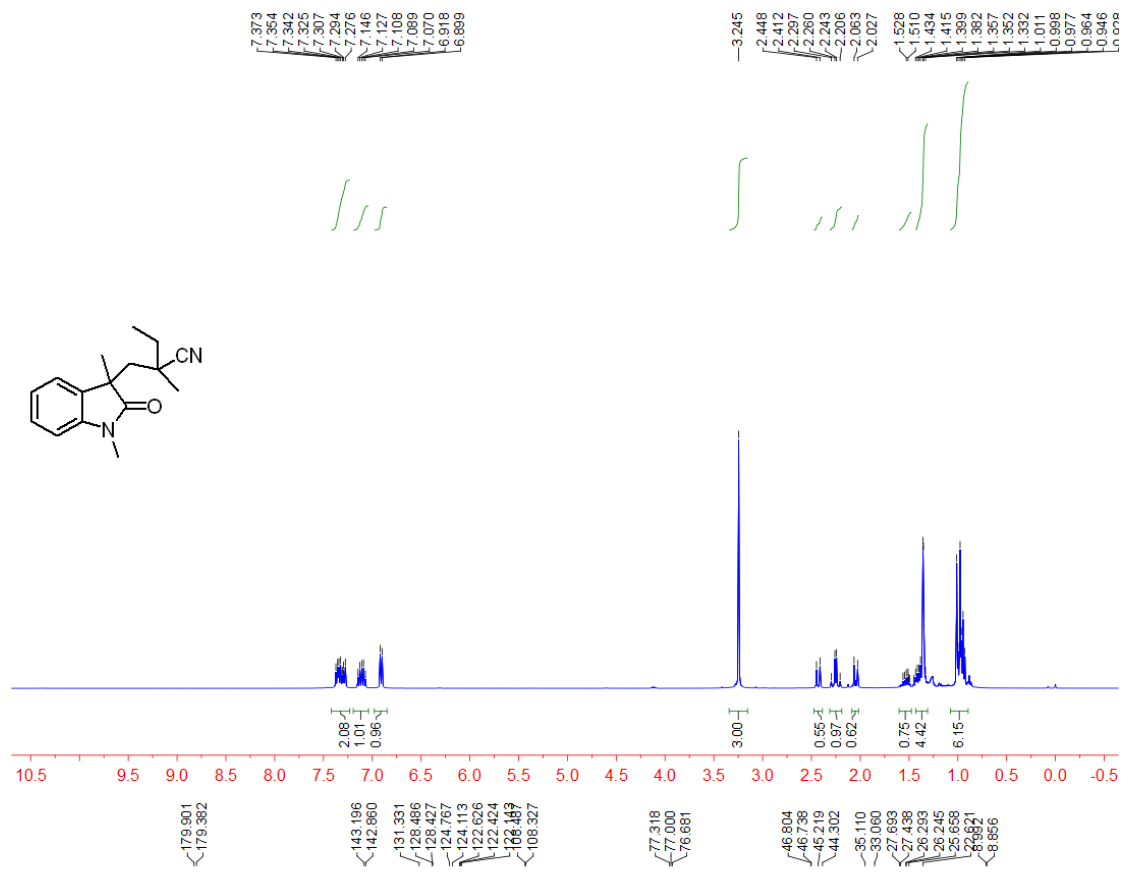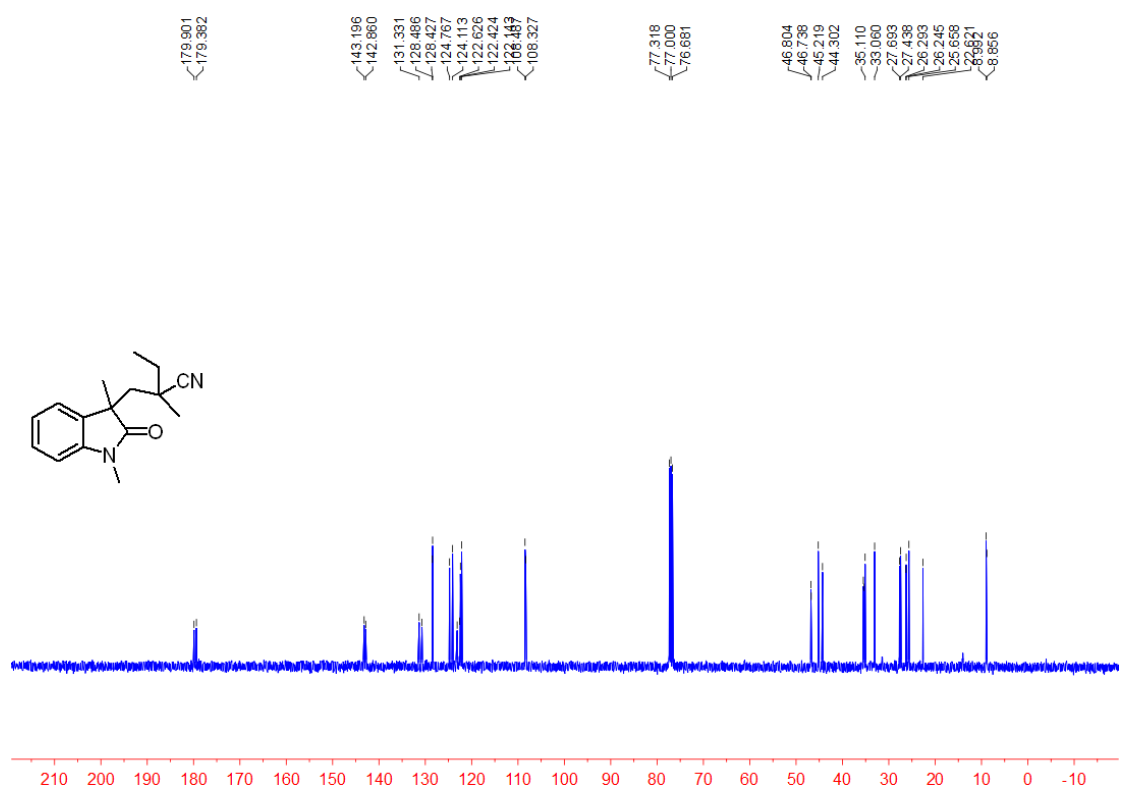

Supplement: c5ra10084d1.pdf [file c5ra10084d1.pdf]
